1  
2  
3  
4  
5  
6  
7  
8  
9  
10  
11  
12  
13  
14  
15  
16  
17  
18  
19  
20  
21  
22  
23  
24  
25  
26  
27  
28  
29

**Ki-67 and condensins support the integrity of mitotic chromosomes through distinct mechanisms**

Masatoshi Takagi<sup>1</sup>, Takao Ono<sup>2</sup>, Toyoaki Natsume<sup>3</sup>, Chiyomi Sakamoto<sup>4</sup>, Mitsuyoshi Nakao<sup>4</sup>, Noriko Saitoh<sup>4,5</sup>, Masato T. Kanemaki<sup>3</sup>, Tatsuya Hirano<sup>2</sup>, and Naoko Imamoto<sup>1</sup>

<sup>1</sup> Cellular Dynamics Laboratory, RIKEN  
<sup>2</sup> Chromosome Dynamics Laboratory, RIKEN  
<sup>3</sup> Division of Molecular Cell Engineering, NIG  
<sup>4</sup> IMEG, Kumamoto University  
<sup>5</sup> Department of Cancer Biology, The Cancer Institute of JFCR

Running title: Assembly of mitotic chromosomes

Key words: Ki-67, condensin, mitotic chromosome, AID

Corresponding author:  
Masatoshi Takagi, Ph.D.  
Cellular Dynamics Laboratory, RIKEN  
2-1 Hirosowa, Wako,  
Saitama 351-0198, Japan  
Phone: +81-48-467-9554  
Fax: +81-48-462-4716  
E-mail: [mtakagi@riken.jp](mailto:mtakagi@riken.jp)

29 **Abstract**

30

31 Although condensins play essential roles in mitotic chromosome assembly, Ki-67, a  
32 protein localizing to the periphery of mitotic chromosomes, had also been shown to  
33 make a contribution to the process. To examine their respective roles, we generated a  
34 set of HCT116-based cell lines expressing Ki-67 and/or condensin subunits that were  
35 fused with an auxin-inducible degron for their conditional degradation. Both the  
36 localization and the dynamic behavior of Ki-67 on mitotic chromosomes were not  
37 largely affected upon depletion of condensin subunits, and vice versa. When both Ki-67  
38 and SMC2 (a core subunit of condensins) were depleted, ball-like chromosome clusters  
39 with no sign of discernible thread-like structures were observed. This severe defective  
40 phenotype was distinct from that observed in cells depleted of either Ki-67 or SMC2  
41 alone. Our results show that Ki-67 and condensins, which localize to the external  
42 surface and the central axis of mitotic chromosomes, respectively, have independent yet  
43 cooperative functions in supporting the structural integrity of mitotic chromosomes.

44

45

46

47

48

49 **List of Abbreviations used**

50

51 AID auxin-inducible degron  
52 DOX doxycycline  
53 FRAP fluorescence recovery after photobleaching  
54 IAA indol-3-acetic acid  
55 mACI mAID-mClover  
56 mACh mAID-mCherry  
57 NEBD nuclear envelope breakdown  
58 SMC structural maintenance of chromosomes  
59 STLC S-Trityl-L-cysteine  
60 topo II $\alpha$  topoisomerase II $\alpha$

61

61 **Introduction**

62

63 During mitosis of animal cells, the nuclear envelope breaks down and chromatin  
64 surrounded by the nuclear envelope is now packaged into a discrete set of rod-shaped  
65 structures, known as mitotic chromosomes. This process enables different chromosomes  
66 to individualize, duplicated chromatids to resolve, and sister kinetochores to properly  
67 attach to the mitotic spindle, thereby ensuring the faithful segregation of genetic  
68 materials into daughter cells. Extensive studies during the past two decades have  
69 established that a class of multiprotein complexes, condensins, play central roles in  
70 mitotic chromosome assembly and segregation (Hirano, 2016; Uhlmann, 2016). Most  
71 eukaryote species have two different types of condensin complexes (condensins I and  
72 II). The two complexes share the same pair of structural maintenance of chromosome  
73 (SMC) ATPase subunits (SMC2 and SMC4), and have distinct sets of non-SMC  
74 regulatory proteins (CAP-H, -D2, and -G for condensin I, CAP-H2, -D3, and -G2 for  
75 condensin II). A recent study has shown that structures reminiscent of mitotic  
76 chromosomes can be reconstituted *in vitro* using a limited number of purified factors,  
77 including core histones, three histone chaperones, topoisomerase II $\alpha$  (topo II $\alpha$ ), and  
78 condensin I (Shintomi et al., 2015). It is clear, however, that this list represents a  
79 minimum set of proteins required for building mitotic chromosomes, and that additional  
80 proteins must cooperate to provide them with physical and physicochemical properties  
81 that support and promote their own segregation. Candidates for such proteins include  
82 linker histones (Maresca et al., 2005), the chromokinesin KIF4 (Mazumdar et al., 2006;

83 Samejima et al., 2012; Takahashi et al., 2016) and Ki-67 (Booth et al., 2016; Takagi et  
84 al., 2016).

85           Ki-67 is a nucleolar protein widely appreciated as a cell proliferation marker  
86 (Scholzen and Gerdes, 2000). During mitosis, Ki-67 is localized around mitotic  
87 chromosomes and constitutes a perichromosomal layer to which many nucleolar  
88 proteins are targeted (Booth et al., 2014; Takagi et al., 2014). To assess the mitotic  
89 function of Ki-67, we have recently generated HCT116-based cell lines in which  
90 endogenous Ki-67 was degraded conditionally and acutely via an auxin-inducible  
91 degron (AID) (Takagi et al., 2016). Using the cell lines, we demonstrated that Ki-67  
92 aids the finalization of mitotic chromosome assembly and the maintenance of  
93 rod-shaped chromosome structures (Takagi et al., 2016). Another recent study has  
94 demonstrated that Ki-67 may act as a biological “surfactant” to prevent the coalescence  
95 of mitotic chromosomes by using its positively-charged, extended conformation that  
96 orients perpendicular to the surface of mitotic chromosomes (Cuylen et al., 2016).  
97 Despite these intriguing observations, it remains unclear how the perichromosomally  
98 localized proteins such as Ki-67 might functionally cooperate with the axially localized  
99 proteins such as condensins to build individual chromosomes and to support their  
100 segregation during mitosis.

101           In the current study, we aimed to address the question by conditionally  
102 depleting Ki-67 and condensin subunits individually or simultaneously from mitotic  
103 cells. To this end, we generated a panel of HCT116-based cell lines expressing Ki-67  
104 and/or condensin subunits that were fused with AID for their conditional degradation



105 and with fluorescent proteins for imaging. Remarkably, ball-like chromosome clusters  
106 with no sign of discernible thread-like structures were observed in mitotic cells depleted  
107 of both Ki-67 and SMC2. To further assess this unprecedented “slime-ball” phenotype,  
108 we introduced a quantitative analysis using a supervised machine-learning algorithm,  
109 wndchrm (Ono et al., 2017; Orlov et al., 2008). We also present evidence that aberrant  
110 kinetochore-microtubule attachments accompany the formation of the slime ball. The  
111 observations presented here argue that Ki-67 and condensins, which localize to the  
112 external surface and the central axis of mitotic chromosomes, respectively, have  
113 independent yet cooperative functions in supporting the structural integrity of mitotic  
114 chromosomes in mammalian cells.  
115

115 **Results**

116

117 **Ki-67 and hCAP-H/H2 localize on mitotic chromosomes independently of one**

118 **another**

119 We previously generated an HCT116-based cell line (AID2) in which endogenous  
120 Ki-67 was fused to mAID and mClover (mACI), thereby enabling us to degrade Ki-67  
121 conditionally upon addition of indol-3-acetic acid (IAA) (Takagi et al., 2016). To  
122 examine the localization of hCAP-H (a subunit specific to condensin I) and hCAP-H2  
123 (a subunit specific to condensin II) in the absence of Ki-67, we further modified AID2,  
124 by a CRISPR-mediated knock-in strategy, to generate AID11 and AID44, in which  
125 hCAP-H and hCAP-H2, respectively, were C-terminally fused to mCherry. AID11 and  
126 AID44 cells were synchronized to G2 phase in the presence or absence of IAA, and  
127 then released into M phase in the presence of S-Trityl-L-cysteine (STLC), a KIF11/Eg5  
128 inhibitor (Fig. 1A). One hour after the release, the cells were subjected to immunoblot  
129 analysis (Fig. 1B) and microscopic observation (Fig. 1C,D). In both cell lines, Ki-67  
130 fused to mACI was degraded upon addition of IAA (Fig. 1B, lanes 3 and 6) as had been  
131 shown in their ancestor cell line AID2 (Takagi et al., 2016). Whereas hCAP-H-mCherry  
132 and hCAP-H2-mCherry were detected at positions bigger than their endogenous  
133 counterparts in the blots due to the mCherry-tagging, no signal was detected at the size  
134 of their endogenous counterparts (lanes 2-3 and 5-6), indicating that both alleles of their  
135 genomes had been edited as intended. In a subpopulation of IAA-treated cells (~10% at  
136 most), the fluorescence signal of Ki-67-mACI was still detectable under the current

137 condition. In the microscopic observation, we focused on cells in which the signal  
138 decreased to an undetectable level. We found that both hCAP-H-mCherry and  
139 hCAP-H2-mCherry localized at the axial regions of mitotic chromosomes similarly to  
140 the endogenous counterparts even though the overall morphology of chromosomes  
141 slightly swelled upon Ki-67 degradation (Fig. 1C,D), a result consistent with the  
142 previous observation obtained by immunofluorescence using specific antibodies  
143 (Takagi et al., 2016).

144 We then wished to investigate the localization of Ki-67 in the absence of  
145 hCAP-H or hCAP-H2. To this end, we generated AID12 and AID13 in which hCAP-H  
146 and hCAP-H2, respectively, were C-terminally fused to mAID and mCherry (mACh).  
147 Their conditional degradation upon addition of IAA was verified by immunoblot  
148 analysis (Fig. 1E) and microscopic observation (Fig. 1F,G). Upon depletion of either  
149 hCAP-H or hCAP-H2, the perichromosomal localization of Ki-67 was not significantly  
150 altered (Fig. 1F,G). Taken these results together, we conclude that Ki-67 and  
151 hCAP-H/H2 localize on mitotic chromosomes independently of one another.

152

153 **Ki-67 displays its perichromosomal localization and associates dynamically with**  
154 **mitotic chromosomes regardless of the presence or absence of SMC2**

155 To determine unequivocally whether Ki-67 localizes to the periphery of mitotic  
156 chromosomes independently of condensins, we wish to generate a cell line in which  
157 SMC2, an ATPase subunit shared by condensins I and II, was C-terminally fused to  
158 mACh. We first attempted to generate such a cell line based on the standard protocol

159 using NIG272 as a mother cell line, in which *OsTIR1*, a ubiquitin E3 enzyme specific to  
160 AID-tagged proteins, was expressed constitutively, but without success, possibly due to  
161 reduced expression of SMC2 in the absence of IAA (discussed in Natsume et al. 2016).  
162 We circumvented this problem by using NIG430 as a mother cell line, in which *OsTIR1*  
163 was expressed conditionally upon addition of doxycycline (DOX) (Natsume et al.,  
164 2016). The resultant cell line, AID30, were treated according to the protocol shown in  
165 Fig. 2A, and then subjected to immunoblot analysis (Fig. 2B) and microscopic  
166 observation (Fig. 2C,D). We noticed that degradation of SMC2-mACh upon the  
167 treatment with IAA was inefficient in AID30, probably because of a lower expression  
168 level of *OsTIR1* compared to that seen in the mother cell (NIG430) (Fig. 2B).  
169 Reflecting this, variable levels of the SMC2-mACh signal were detected among  
170 individual cells treated with IAA (Fig. 2C,D). Cells where SMC2-mACh was reduced  
171 to less than 25% of the original level upon the treatment with IAA were rare (15 out of  
172 127 cells: 11.8%; Fig. 2C). We noticed, however, that, in all cells with undetectable  
173 levels of SMC2-mACh, chromosomes lost their slim rod-like shapes and contracted into  
174 a smaller space (Fig. 2D, the third row). Although individualization of each  
175 chromosome became ambiguous in these cells, it was still possible to trace Ki-67 on the  
176 poorly organized chromosomes, indicating that SMC2 is largely dispensable for the  
177 perichromosomal localization of Ki-67.

178 We then wished to test whether depletion of SMC2 might affect this dynamic  
179 behavior of Ki-67 by fluorescence recovery after photobleaching (FRAP) experiments  
180 (Saiwaki et al., 2005). According to the protocol depicted in Fig. S2A, AID14

181 (expressing Ki-67-mACI plus hCAP-H-mACh; Fig. S1) cells were transfected twice  
182 with control siRNA (siControl) or siRNA against SMC2 (siSMC2), treated with  
183 reagents for synchronization, and then subjected to FRAP experiments. We measured  
184 the FRAP of Ki-67-mACI in cells with undetectable levels of hCAP-H-mACh (Fig.  
185 S2D,E), and found that it was indistinguishable from that observed in the control cells  
186 (Fig. S2B,C). These results indicate that the dynamic behavior of Ki-67 on the  
187 periphery of chromosomes does not depend on SMC2, or chromatin structure supported  
188 by condensins.

189

## 190 **Chromosomes rapidly lose their structural integrity upon nuclear envelope**

### 191 **breakdown in cells devoid of both Ki-67 and SMC2**

192 In the absence of either Ki-67 (Fig. 1C,D) or SMC2 (Fig. 2C), the architecture of  
193 mitotic chromosomes was compromised in different manners, suggesting that Ki-67 and  
194 condensins contribute to this event through distinct molecular mechanisms. To further  
195 examine the functional relationship between Ki-67 and condensins, we sought to  
196 deplete these chromosomal components simultaneously. To this end, we generated  
197 another cell line AID35, in which Ki-67 and SMC2 were C-terminally tagged with  
198 mACI and mACh, respectively. AID35 cells were treated according to the protocol  
199 shown in Fig. 3A. Cell lysates were prepared and subjected to immunoblot analysis to  
200 confirm that the bulk levels of the target proteins were substantially reduced in the  
201 presence of IAA (Fig. 3B). Microscopic inspection of individual cells revealed that the  
202 Ki-67-mACI levels were reduced to less than 20% of the original level in 59% of

203 IAA-treated cells (19 out of 32 cells) inspected (Fig. 3C). Live cell imaging  
204 demonstrated that, in the absence of IAA, the behaviors of Ki-67-mACI and  
205 SMC2-mACh were indistinguishable from those of their endogenous counterparts in  
206 AID35 (Fig. 3D). We then monitored cells in which the signals of Ki-67 and SMC2  
207 effectively disappeared in the presence of IAA (Fig. 3E). We found that chromosome  
208 compaction in the prophase nucleus was compromised in these cells (Fig. 3E, time -10'),  
209 as expected from the previous studies reporting condensin depletion (Ono et al., 2004;  
210 Hirota et al., 2004). A striking phenotype in chromosome morphology was observed  
211 immediately after nuclear envelope breakdown (NEBD). 10 min after NEBD and  
212 thereafter, chromatin formed a single cluster, displaying a ball-like structure in which  
213 the shape and border of individual chromosomes were not discerned (Fig. 3E, time  
214 10'-40'). To our knowledge, this type of abnormal chromosome structures in mitotic  
215 cells had not been reported in the literature before: we therefore refer to this  
216 unprecedented structure as a "slime ball" hereafter. Interestingly, the slime ball was  
217 frequently observed at one side of the cytoplasm, being placed at the vicinity of the cell  
218 cortex. Moreover, part of the slime ball seemed to be pulled in the opposite direction,  
219 forming "protrusions" that were readily discernible with Hoechst staining (see a later  
220 section).

221

222 **Mitotic chromosomes rapidly lose their structural integrity upon the degradation**  
223 **of both Ki-67 and SMC2 even after their assembly is complete**

224 We next wished to test what would happen when the degradation of both Ki-67 and

225 SMC2 was induced after mitotic chromosome assembly was complete. To this end, we  
226 treated AID35 cells with the protocol depicted in Fig. 4A. In this protocol, IAA was  
227 added one hour after removing RO-3306 (rather than being added at the same time of  
228 RO-3306 addition). At the time point when IAA was added, the cell had already entered  
229 mitosis, displaying a discrete set of condensed chromosomes: Ki67-mACI localized to  
230 the external surface of chromosomes, whereas SMC2-mACh was detectable on their  
231 central axis (Fig. 4B, time 0'). 40 min after addition of IAA, the signals of Ki-67-mACI  
232 and SMC2-mACh started to decrease, and chromosomes tended to lose their rod-shaped  
233 morphology (Fig. 4B, time 40'). After 60 min, both signals diminished to an  
234 undetectable level, and chromosomes form a single cluster with protrusions (Fig. 4B,  
235 time 60', 80' and 100'), whose morphology was very similar to that of the slime ball  
236 shown in Fig. 3. In control cells in which both Ki-67 and SMC2 escaped from  
237 degradation during the imaging period, mitotic chromosomes kept their structural  
238 integrity (Fig. S3C). Taken the observations in Figs. 3,4 together, we conclude that cells  
239 can neither establish nor maintain the structural integrity of mitotic chromosomes when  
240 both Ki-67 and SMC2 are absent.

241

#### 242 **Validation of the observed chromosome morphology by a machine learning** 243 **algorithm**

244 In the experiments above, we observed seemingly different impacts on the morphology  
245 of mitotic chromosomes caused by depletion of either Ki-67, SMC2, or both of them.  
246 When comparing the images of those chromosomes side by side (Fig. 5A), the defective  
247 phenotypes observed among the three cell lines were clearly distinct from each other.

248 Nevertheless, to further validate these differences objectively and quantitatively, we  
249 used a supervised machine-learning algorithm, wndchrm (weighted neighbor distances  
250 using a compound hierarchy of algorithms representing morphology) (Ono et al., 2017;  
251 Orlov et al., 2008). We first collected 36 images of mitotic chromosomes observed  
252 under each of the four conditions (control, Ki-67 depletion, SMC2 depletion, and  
253 Ki-67/SMC2 double depletion), and each set was defined as a class. Different numbers  
254 of images (5-35 images) were randomly selected from each class, and they were  
255 subjected to wndchrm analysis for constructing classifiers. We found, as expected, that  
256 the classification accuracy (CA) obtained with those classifiers increased according to  
257 the number of images used, reaching a plateau when more than 15 images from each  
258 class were used (Fig. 5B). Then, the 36 images in each class were randomly divided into  
259 two independent subclasses (subclasses 1 and 2, each containing 18 images). The  
260 resultant eight subclasses were processed in parallel for wndchrm analysis, and the  
261 differences included in those images were statistically evaluated. The results were  
262 displayed as morphological distances (MD) between two different subclasses (Fig. 5C)  
263 and also as a phylogeny tree (Fig. 5D). In the phylogeny tree, the two subclasses  
264 derived from each class were closely clustered with each other, confirming the  
265 assurance of this classification method. Notably, the four classes were distantly  
266 branched from each other, positioning at vertexes of a cruciform having four branches  
267 of similar lengths. This result indicates that the morphology of mitotic chromosomes  
268 formed in the four different settings tested are distinct from each other, and that the  
269 defective phenotype observed in cells devoid of both Ki-67 and SMC2 is closer to



270 neither that observed in cells devoid of Ki-67 alone nor that observed in cells devoid of  
271 SMC2 alone.

272

273 **Additional characterization of the slime-ball phenotype observed in cells devoid of**  
274 **both Ki-67 and SMC2**

275 To further characterize the slime-ball phenotype observed in cells devoid of both Ki-67  
276 and SMC2 (Fig. 3E), those cells were fixed one hour after the release into mitosis and  
277 subjected to immunofluorescence analyses using various antibodies (Fig. 6A-D). One of  
278 the most conspicuous observations upon depletion of both Ki-67 and SMC2 was the  
279 loss of radial arrays of microtubules and the emergence of microtubule bundles passing  
280 through the slime ball (Fig. 6A,D). The centrosomes, as judged by the localization of  
281 pericentrin, were located away from the chromosome mass (Fig. 6D). Chromosomal  
282 regions containing kinetochores, as determined by the localization of Hec1 (an outer  
283 kinetochore component), seemed to be pulled along the microtubule bundles toward the  
284 centrosome (Fig. 6B), thereby producing the protrusions characteristic of the slime ball.  
285 Interestingly, strong signals of topo II $\alpha$  were detectable along the protrusions (Fig. 6C),  
286 implicating that topo II-enriched pericentromeric heterochromatic regions were also  
287 pulled by the microtubule bundles. In parallel with these observations, cells devoid of  
288 only SMC2 (AID30 treated with IAA) were examined (Figs. 6D,S4). Although Hec1  
289 signals were seen clustered at one side of the nucleus as well (Fig. S4B) probably along  
290 microtubule fibers (Figs. 6D,S4A), accumulation of topo II $\alpha$  on certain chromosomal  
291 regions was not clearly observed (Fig. S4C). The protrusions were less obvious in cells

292 devoid of SMC2 alone compared to cells devoid of both Ki-67 and SMC2 (Figs. 6D,S4).  
293 In fact, the distance between the centroid of chromatin mass and the Hec1-positive  
294 region was shorter in the former cells than in the latter cells (Fig. 6E). Assuming that  
295 the emergence of the Hoechst-positive protrusions reflects a loss of structural integrity  
296 of chromosomes, the chromosomes devoid of both Ki-67 and SMC2 appeared more  
297 fragile than those devoid of SMC2 alone. The alteration of microtubule organization,  
298 which was accompanied with the depletion of SMC2, might contribute to and accelerate  
299 the formation of the slime-ball phenotype (see Discussion).  
300

300 **Discussion**

301

302 In the current study, we aimed to understand the functional relationship between Ki-67  
303 and condensins in establishing and maintaining the structural integrity of mitotic  
304 chromosomes in human cells. Using a panel of HCT116-based AID cells, in which  
305 Ki-67 or subunits of condensins can be degraded conditionally, we first extended our  
306 previous finding that Ki-67 and condensins behaved independently in mitotic cells  
307 (Takagi et al., 2016). We then examined defective phenotypes caused by depletion of  
308 both Ki-67 and condensins. The defect we observed was unprecedentedly drastic, which  
309 was further validated by the image analyses using a supervised machine-learning  
310 algorithm, wndchrn. Our results suggest that Ki-67 and condensins have independent  
311 yet cooperative functions in supporting the structural integrity of mitotic chromosomes.

312

313 **Contribution of Ki-67 to the structure of mitotic chromosomes is rather cryptic**

314 In the current study, we have shown that mitotic chromosomes assembled in the  
315 absence of Ki-67 display a swollen morphology (Figs. 1,5; Takagi et al., 2016).  
316 Consistently, a recent study showed that the total volume of mitotic chromosomes  
317 (DAPI-stained chromatin regions) increased by 38% upon siRNA-mediated depletion of  
318 Ki-67 in RPE-1 cells (Booth et al., 2016). Somewhat inconsistent with these data,  
319 however, we and others also noticed that Ki-67 depletion had little impact on the  
320 morphology of mitotic chromosomes when they were spread on the surface of slide  
321 glasses (“mitotic spreads”) or when they were simply exposed to hypotonic buffers

322 (Cuylen et al., 2016; data not shown). We infer that Ki-67's contribution to the  
323 structural integrity of mitotic chromosomes becomes apparent only when they are in  
324 close proximity in the cell, and that this situation is heavily perturbed when the cells are  
325 exposed to hypotonic buffers and/or subjected to spreading techniques. This idea is  
326 consistent with the recent proposal that Ki-67 could function as a “surfactant”  
327 (electrostatic charge barrier) that helps to prevent the coalescence of individual  
328 chromosomes (Cuylen et al., 2016).

329           It deserves to mention that the defective impact on chromosome appearance  
330 upon depletion of Ki-67 was seen more evidently in the experiments using the AID  
331 system (Takagi et al., 2016; this study) than in the previous experiments using siRNAs  
332 (Takagi et al., 2014; Vanneste et al., 2009). This might be explained by the quickness of  
333 Ki-67 degradation which was realized by the AID system, and also by the sure selection  
334 of cells to be observed based on the loss of fluorescence (derived from the fluorescent  
335 protein tagged tandemly to the AID). Likewise, the AID system is also powerful in  
336 perturbing condensin functions (Figs. 2,5,S4): depletion of condensins with other  
337 methods used so far, such as siRNA transfection or transcriptional repression, has been  
338 reported to cause relatively mild defects in chromosome condensation (Gassmann et al.,  
339 2004).

340

341 **Double depletion of Ki-67 and condensins causes unprecedented severe defects in**  
342 **chromosome architecture and behaviors**

343 The current study has shown that cells devoid of both Ki-67 and SMC2 fail to assemble

344 thread-like mitotic chromosomes, instead forming a ball-like chromatin cluster with no  
345 discernible borders between individual chromosomes, which we call the “slime ball”  
346 (Fig. 3D). This particular phenotype was different from, and much severer than, that  
347 observed in the absence of either Ki-67 or SMC2 alone (Fig. 5A). We have also shown  
348 that the depletion of Ki-67 and SMC2 “after” the completion of chromosome assembly  
349 causes a drastic contraction of thread-like chromosomes into a chromatin cluster  
350 reminiscent of the slime ball (Figs. 4,S3). Such a drastic phenotype has never been  
351 observed by depleting either Ki-67 (Takagi et al., 2016) or SMC2 alone after the  
352 completion of chromosome assembly. Together also with their independent behaviors in  
353 mitotic cells (Figs. 1,2,S2), it is reasonable to speculate that Ki-67 and SMC2 support  
354 the structural integrity of mitotic chromosomes through distinct molecular mechanisms.  
355 What is the relationship between the two distinct mechanisms? The subunits of  
356 condensins were widely conserved among eukaryotes and play fundamental roles in the  
357 organization and segregation of mitotic chromosomes (Hirano, 2016). On the other hand,  
358 the orthologs of Ki-67 are detectable only in vertebrates. Ki-67 could have evolved to  
359 play an auxiliary role in increasing the fidelity of segregation of chromosomes,  
360 especially, of large size. Such an evolutionary situation could parallel the emergence of  
361 increasing numbers of phase-separated organelles in complex organisms (Banani et al.,  
362 2017). Alternatively, non-vertebrate cells could have a peripheral chromosomal protein  
363 that plays an equivalent role to that of Ki-67 but has no sequence similarity to it.

364 Vertebrate cells have two different condensin complexes, condensins I and II,  
365 which behave and function differently (Green et al., 2012; Hirota et al., 2004; Ono et al.,

366 2004). To get more insight into the mechanism behind the formation of the slime- ball  
367 phenotype, we co-depleted Ki-67 with either hCAP-H or hCAP-H2 (Fig. S1). Double  
368 depletion of Ki-67/hCAP-H or Ki-67/hCAP-H2 displayed less severe defects than  
369 double depletion of Ki-67/SMC2: the chromosomes were more swollen than  
370 Ki-67-depleted chromosomes, but never produced a phenotype reminiscent of the  
371 slime- ball phenotype observed in cells devoid of both Ki-67 and SMC2. Thus, loss of  
372 both functions of condensins I and II, along with loss of Ki-67, is required to create the  
373 highly characteristic defective phenotype.

374

375 **What mechanism might underlie the formation of the slime ball?**

376 In the current study, we have shown that depletion of SMC2 alone or Ki-67 and SMC2  
377 commonly causes microtubules to lose their radial arrays and to make bundles in  
378 STLC-treated mitotic cells (Figs. 6A,D, and S4A). This defect in microtubule  
379 orientation is therefore specific to loss of SMC2, but not that of Ki-67. A similarly  
380 characteristic microtubule orientation was observed in STLC-treated cells when “end-on”  
381 attachments of microtubules to kinetochores were blocked by depleting Nuf2 (Silk et al.,  
382 2009), suggesting strongly that kinetochores formed in cells devoid of SMC2 are  
383 “laterally” attached to microtubule fibers. Consistent with the notion,  $\alpha$ -tubulin and  
384 Hec1 showed localization patterns close to but exclusive from each other in cells devoid  
385 of SMC2 (Fig. S4D). It should be noted that the slime-ball phenotype was observed  
386 only in cells devoid of both Ki-67 and SMC2. While the slime ball as a whole was  
387 pushed to one side in the cytoplasm to the vicinity of the cell cortex, the kinetochores

388 were clustered at the opposite side (Figs. 6B,S5) and pulled to the direction to the minus  
389 end of microtubules (Fig. 6D) probably via their lateral attachment to the bundled  
390 microtubules (Fig. S5D). Although the similar distribution of kinetochores relative to  
391 microtubule bundles occurred also in cells devoid of SMC2 alone (Fig. S4), those  
392 kinetochores tended to stay close to the chromatin mass (Fig. 6E). We imagine that the  
393 formation of the slime ball might be based on the reduced rigidity of chromosomes,  
394 which is caused by double depletion of Ki-67 and SMC2, and accelerated by the  
395 “unidirectional” pulling force exerted on kinetochores along the bundled microtubules,  
396 which is caused by depletion of SMC2 alone, as illustrated in Fig. S5E.

397           We verified that not only Hec1 (an outer kinetochore component; Fig. 6B) but  
398 also CENP-A (a centromeric chromatin component), CENP-I/hMis6 (an inner  
399 kinetochore component) and BubR1 (a spindle check point kinase) were localized in the  
400 protrusions of slime ball (Fig. S5). These observations suggest that most, if not all,  
401 components of kinetochores remain intact within each kinetochore unit. We speculate,  
402 however, that some specific components or abilities necessary for the end-on  
403 attachments of microtubules are lost from the kinetochores in the slime ball (and  
404 similarly from those in cells devoid of SMC2 alone). It will be important to understand  
405 in the future how loss of SMC2 produces such a drastic and specific phenotype in  
406 kinetochore-microtubule attachments.

407

408 **Conclusions**

409 The key observations we made in the current study are summarized in Fig. 7. The most  
410 important finding is that cells devoid of both Ki-67 and condensins rapidly lose the  
411 structural integrity of mitotic chromosomes to an unprecedented level. In light of this  
412 finding, we propose a new concept in which Ki-67 and condensins, which localize to  
413 the external surface and the central axis of mitotic chromosomes, respectively,  
414 cooperate to support the structural integrity of mitotic chromosomes through distinct  
415 mechanisms. Additionally, we propose the possibility that the contacts and interferences  
416 among mitotic chromosomes must be restricted through the action of Ki-67, otherwise  
417 the chromosome morphology is adversely affected.  
418



418 **Materials and methods**

419

420 **Establishment of cell lines and their handling**

421 HCT116 cells and its derivatives were cultured at 37°C with 5% CO<sub>2</sub> in DMEM  
422 supplemented with 10% FBS. A panel of cells, collectively called AID cells in the  
423 current manuscript, were generated from HCT116 cells via successive uses of  
424 CRISPR/Cas9-mediated genome editing as described previously (Natsume et al., 2016).  
425 Briefly, as the first step, the constitutive or DOX-inducible expression units of *O<sub>s</sub>TIR1*  
426 was integrated in the AAVS1 locus of the HCT116 genome to generate cells called  
427 NIG272 or NIG430, respectively (Natsume et al., 2016). In these cells, as the second  
428 step, cassette sequences encoding variable tags were knocked-in immediately upstream  
429 of the stop codons of genes to be analyzed. Table S1 contains a list of the parental lines,  
430 the target genes, the kind of tags, the sequences of guide RNAs, the plasmid names of  
431 targeting and knock-in constructs, and antibiotics used for generating AID cells. Of  
432 cellular clones selected by their resistant to antibiotics (700 µg/ml neomycin or 100  
433 µg/ml hygromycin B), the final selection of AID11 and AID44 were carried out visually  
434 with fluorescence microscopy. For other cell lines, clones in which the genome had  
435 been edited as designed in both alleles were selected by genomic PCRs using  
436 KOD-plus-Neo (TOYOBO, Osaka, Japan) and appropriate primer sets listed in Table  
437 S2. Successful editing in both alleles was further confirmed by immunoblotting (to  
438 check the loss of target proteins of their original size).

439 For fixed-cell immunofluorescence, cells were seeded on coverslips treated

440 with 10 µg/ml fibronectin (Wako, Osaka, Japan). For live-cell imaging, including FRAP  
441 analysis, cells were seeded onto glass-bottom dishes (IWAKI, Tokyo, Japan).  $2 \times 10^5$   
442 cells were plated on a 35-mm dish (either a glass-bottom dish or a polystyrene dish  
443 containing four fibronectin-coated round coverslips) 1 day before the experiments and  
444 processed as follows. Cells were treated with 2 mM thymidine for 16 h, released in  
445 thymidine-free medium for 6-7 h, treated with 10 µM RO-3306 (Tocris, Minneapolis,  
446 MN) for 3 h for arrest at the G2/M boundary, and released in medium containing 10 µM  
447 STLC (Tokyo Chemical Industry, Tokyo, Japan) for arrest in mitosis. Cells were  
448 mock-treated or treated with 0.5 mM IAA (Tokyo Chemical Industry) during the period  
449 depicted in Figs. 1A,2A,3A,4A,S3A. For the observations of AID cells derived from  
450 NIG430 (AID29, AID30 and AID35), incubation with 2 µg/ml DOX (MP Biomedicals,  
451 Santa Ana, CA) after the release from thymidine block was added for inducing the  
452 expression of *OsTIR1*. For probing DNA in live-cell observations, cells were treated  
453 with 100 ng/ml Hoechst 33342, 30 min before removing RO-3306.

454

#### 455 **Immunoblotting**

456 Cells were washed twice with ice-cold PBS supplemented with 0.3 mM PMSF,  
457 collected by centrifugation, and snap-frozen in liquid nitrogen. Cell pellets were  
458 resuspended in buffer B (20 mM Tris-HCl [pH 7.5], 150 mM NaCl, 5 mM MgCl<sub>2</sub>, 0.1%  
459 NP-40, 1 mM DTT, Complete Protease Inhibitor Mixture [Roche, Basel, Switzerland],  
460 and PhosSTOP [Roche]) supplemented with 0.25 units/ml Benzonase (Novagen,  
461 Madison, WI, USA), kept on ice for 30 min, mixed with the same volume of 4x

462 concentrated sample buffer (250 mM Tris-HCl [pH 6.8], 8% SDS, 40% glycerol, 0.02%  
463 bromophenol blue, and 0.1 M DTT), and heated at 95°C. The denatured protein samples  
464 were electrophoretically separated on a SuperSep Ace 5-20% gradient gel (Wako,  
465 Osaka, Japan) and blotted onto a Immobilon-P membrane (Merck Millipore, Billerica,  
466 MA). The following antibodies were used as primary antibodies at the indicated  
467 dilutions or concentrations: mouse anti- $\beta$ -actin (1:5,000, AC-15; Sigma-Aldrich, St.  
468 Louis, MO), rabbit anti-NCAPH/hCAP-H (1:1,000, 11515-1; ProteinTech, Rosemont,  
469 IL), rabbit anti-hCAP-H2 (1  $\mu$ g/ml, AfR205-4L; Ono et al., 2003), rabbit anti-Ki-67  
470 (1:1,000, sc-15402; Santa Cruz, Dallas, TX), rabbit-*Os*TIR1 (1:1,000; Natsume et al.,  
471 2016), rabbit anti-SMC2 (1:1,000, ab10412; Abcam, Cambridge, UK), and mouse  
472 anti-topoisomerase II $\alpha$  (1:2,000, 1C5; MBL, Nagoya, Japan) antibodies. The following  
473 antibodies were used as secondary antibodies at the indicated dilutions: goat anti-mouse  
474 HRP (1:3,000, 170-6516; Bio-Rad, Hercules, CA), and goat anti-rabbit HRP (1:3,000,  
475 170-6515; Bio-Rad) antibodies. Protein bands were visualized by chemiluminescence  
476 using Immobilon Western (Merck Millipore).

477

#### 478 **Immunofluorescence**

479 One hour after the removal of RO-3306, cells were fixed with 3.7% PFA in PBS at  
480 room temperature for 10 min. The fixed cells were permeabilized with 0.5% Triton  
481 X-100 in PBS for 5 min, blocked with a blocking solution (PBS containing 5 mg/ml  
482 BSA and 50 mM glycine) for 1 h, and processed for immunofluorescence. The  
483 following antibodies were used as primary antibodies at the indicated dilutions: mouse

484 anti- $\alpha$ -tubulin (1:10,000, DM1A; Sigma-Aldrich), mouse anti-BubR1 (1:400, 8G1;  
485 MBL), mouse anti-CENP-A (1:200, 3-19; MBL), rat anti-CENP-I/hMis6 (1:100,  
486 PD032; MBL), mouse anti-HEC1 (1:1,000, 9G3; GeneTex, Irvine, CA), rabbit  
487 anti-Ki-67 (1:200, sc-15402; Santa Cruz), mouse anti-Ki67 (1:500, NA-59; Merck  
488 Millipore), rabbit anti-pericentrin (1:1,000, ab44448; Abcam), and mouse  
489 anti-topoisomerase II $\alpha$  (1:1,000, 1C5; MBL) antibodies. Secondary antibodies  
490 conjugated with Alexa Fluor 488/594/647 were purchased from Thermo Fisher Science  
491 (Waltham, MA). DNA was counterstained with 0.5  $\mu$ g/ml Hoechst 33342.  
492 Immunofluorescence images were captured with a DeltaVision Core (Applied Precision,  
493 Issaquah, WA, US) with an inverted microscope (IX71; Olympus, Tokyo, Japan), an  
494 UPlanApo 60x/1.40 objective lens (Olympus), and a CoolSNAP HQ2 camera  
495 (Photometrics, Tucson, AZ, US). Images from z sections spaced 0.5- $\mu$ m apart were  
496 acquired, deconvolved with softWorx (Applied Precision), and presented as maximum  
497 intensity projections.

498

#### 499 **Quantification of fluorescence intensities**

500 Cells were fixed and stained with Hoechst 33342 as described above. Images of  
501 chromatin stained with Hoechst 33342 and the fluorescent proteins to be quantified  
502 were captured and processed as described above except for the use of an UPlanFL  
503 40x/0.75 objective lens (Olympus). Chromosomal regions were determined based on  
504 the Hoechst-stained images, and the total pixel intensities of fluorescence images from  
505 those regions were calculated. The obtained values were normalized by the average

506 value of control cells (cells untreated with IAA) and plotted using GraphPad Prism6  
507 (GraphPad Software, La Jolla, CA, US).  
508  
509 **FRAP**  
510 For FRAP experiments, we first attempted to generate a cell line expressing  
511 Ki-67-mClover plus SMC2-mACh, but without success. We therefore decided to use  
512 AID14 (a cell line expressing Ki-67-mACh plus hCAP-H-mACh) which had been  
513 generated for other purposes (Fig. S1). It has to be mentioned that SMC2 is not tagged  
514 with mAID in AID14. FRAP experiments were performed on the laser scanning  
515 confocal microscope FV1200 (Olympus) equipped with PLAPON 60XO/1.42  
516 (Olympus). Cells expressing Ki-67-mACh and hCAP-H-mACh from their intrinsic  
517 promoters (AID14) were transfected with siControl  
518 (5'-CGUACGCGGAAUACUUCGAdTdT; Elbashir et al., 2001) or siSMC2  
519 (5'-UGCUAUCACUGGCUUAAUdTdT; (Gerlich et al., 2006)) at 0 and 24 h at a final  
520 concentration of 10 nM using Lipofectamine RNAiMAX (Thermo Fisher Scientific),  
521 and synchronized in mitosis as described above. The cells were transferred to a  
522 humidified environmental chamber (Stage Top Incubator; TOKAI HIT, Shizuoka,  
523 Japan) maintaining its temperature at 37°C and the CO<sub>2</sub> concentration at 5%, and  
524 subjected to FRAP analysis within 100 min after the release from the cell cycle arrest  
525 with RO-3306. One pre-bleach frame followed by 2-sec bleach time with 473 nm laser  
526 line at 80% transmission, and 8-10 post-bleach frames were recorded at 30-sec intervals.  
527 In parallel with the signal of Ki-67-mACh, the signals of hCAP-H-mACh and DNA

528 (stained with Hoechst 33342) were recorded. The mean mClover fluorescence  
529 intensities of the bleached chromatin region for each time point was normalized to that  
530 of unbleached chromatin region at the same time point within the same cell. As cells  
531 tended to move slightly during the imaging time, the measurement areas were corrected  
532 manually relying on the chromatin images. The value for each time point was further  
533 normalized with that at the pre-bleached frame.

534

### 535 **Live cell observations**

536 Cells cultured in a glass-bottom dish were mounted on an inverted microscope (IX71,  
537 Olympus) equipped with a humidified environment chamber (MI-IBC, Olympus) to  
538 maintain its temperature at 37°C and the CO<sub>2</sub> concentration at 5%. Fluorescence images  
539 were collected with a DeltaVision Core (Applied Precision) from z sections (5 sections  
540 spanning 8 µm for Fig. 3; 5 sections spanning 2 µm for Figs. 4 and S3) every 10 min  
541 with 2 x 2 binning and presented as maximum intensity projections. Differential  
542 interference microscope images were acquired in parallel from a single focal plane.

543

### 544 **Morphological quantification of chromosome with wndchrn**

545 Microscopic images of chromosomes were obtained from fixed cells stained with  
546 Hoechst 33342 using DeltaVision Core (Applied Precision) with an UPlanApo 60x/1.40  
547 objective lens (Olympus). Images from z sections (24 sections spanning 11.5 µm) were  
548 obtained, deconvolved, and presented as maximum intensity projections. For  
549 quantitative assessment of chromosome structures, a supervised machine-learning

550 algorithm, wndchrm (weight neighbor distance using a computed hierarchy of  
551 algorithms representing morphology) ver. 1.52 (Ono et al., 2017; Orlov et al., 2008;  
552 Tokunaga et al., 2014), was applied to 36 projected images (188x188 pixels, 8 bit) in  
553 each condition, which was defined as a class. All of the images in the defined class were  
554 applied to wndchrm, and morphological feature values were assigned by training a  
555 machine. Phylogenies were computed using the Fitch-Margoliash method implemented  
556 in the PHYLIP package ver.3.696, which was based on pairwise class similarity values  
557 reported by wndchrm ver. 1.52 (Felsenstein, 1989; (Johnston et al., 2008)). For each  
558 analysis, cross-validation tests were automatically repeated for 20 times with 13  
559 training/5 test image data set. The options used for the image analysis were a large  
560 feature set of 2919 (-l) and multi- processors (-m). To measure pairwise class  
561 dissimilarity, morphological distances (MD) were calculated as the Euclidean distances  
562 ( $d = \sqrt{\sum(A-B)^2}$ ) from the values in class probability matrix obtained from the  
563 cross-validations (Johnston et al., 2008). To calculate P values, two-sided Student's  
564 *t*-test was performed for each of comparisons. To optimize the classification capacity,  
565 we measured classification accuracy (CA) using different numbers of training data sets,  
566 and found that the accuracy reached a plateau with more than 15 images (Fig. 5B). Then,  
567 each image in a class (36 images) was randomly assigned to two independent sets  
568 (folder 1 and folder 2, each containing 18 images) to confirm that images within the  
569 same class (condition) show negligible differences. They were expected to localize  
570 closely in phylogenies and to show low MD between them.  
571

572 **Measurement of the distance between chromatin mass and Hec1-distributed region**

573 Microscopic images of chromosomes and Hec1 were obtained using DeltaVision Core  
574 (Applied Precision) with an UPlanApo 60x/1.40 objective lens (Olympus). Images from  
575 z sections (40 sections spanning 7.8  $\mu\text{m}$ ) were obtained, deconvolved, and presented as  
576 maximum intensity projections under the same condition. Chromosomal regions were  
577 determined by thresholding the chromosomal images. To delineate Hec1-positive  
578 regions, the convex hull of Hec1 signals were determined manually from the uniformly  
579 binarized images of Hec1. The distances between the centroids of these two regions  
580 were measured and plotted using GraphPad Prism6 (GrapPad Software).

581

582 **Acknowledgments**

583 We thank RIKEN BSI-Olympus Collaboration Center for the technical assistance with  
584 the FRAP experiment. This work was supported by the JSPS KAKENHI (26650070  
585 and 17K07399 to M. T., 16K07455 to T. O., 15K18482 and 17K15068 to T.N.,  
586 16K15095 to M.T.K., 25116009 and 16H04744 to N. S., 15H04707 to M. N., 26251003  
587 to T. H., 15H05929 to N.I.). M.T.K. was supported by a grant from the Mochida  
588 Memorial Foundation for Medical and Pharmaceutical Research, the SGH Foundation,  
589 the Sumitomo Foundation, and the Canon Foundation.

590

591 The authors declare no competing financial interests.

592

593 Author contributions: M. Takagi designed and performed most of the experiments,



594 generated cell lines and constructs, and analyzed data. C. Sakamoto and N. Saitoh  
595 performed the wndchrm analysis, and T. Ono and M. Nakao contributed to the  
596 wndchrm analysis. T. Natsume and M.T. Kanemaki gave advice to M. Takagi on the  
597 AID system. N. Imamoto supervised the entire study. M. Takagi and T. Hirano wrote  
598 the paper with input from all authors.

599

### 600 **Supplemental materials**

601 Fig. S1 shows the characterization of AID14 and AID15. Fig. S2 shows the FRAP  
602 analysis of Ki-67 in the presence or absence of SMC2. Fig. S3 shows the live  
603 observation of AID35 treated with IAA after the establishment of mitotic chromosome  
604 structure. Fig. S4 shows the localization of  $\alpha$ -tubulin, Hec1 and topo II $\alpha$  in cells devoid  
605 of SMC2. Fig. S5 shows the localization of centromere/kinetochore-associated proteins  
606 in cells devoid of both Ki-67 and SMC2. Table S1 lists the AID cell lines. Table S2 lists  
607 the primers used for genomic PCR. Table S3 lists antibodies used in this study.

608

609

### 610 **References**

611

- 612 Banani, S.F., H.O. Lee, A.A. Hyman, and M.K. Rosen. 2017. Biomolecular  
613 condensates: organizers of cellular biochemistry. *Nat Rev Mol Cell Biol.*  
614 18:285-298.
- 615 Booth, D.G., A.J. Beckett, O. Molina, I. Samejima, H. Masumoto, N. Kouprina, V.  
616 Larionov, I.A. Prior, and W.C. Earnshaw. 2016. 3D-CLEM Reveals that a Major  
617 Portion of Mitotic Chromosomes Is Not Chromatin. *Mol Cell.* 64:790-802.
- 618 Booth, D.G., M. Takagi, L. Sanchez-Pulido, E. Petfalski, G. Vargiu, K. Samejima, N.

- 619 Imamoto, C.P. Ponting, D. Tollervey, W.C. Earnshaw, and P. Vagnarelli. 2014.  
620 Ki-67 is a PP1-interacting protein that organises the mitotic chromosome  
621 periphery. *eLife*. 3:e01641.
- 622 Cuylen, S., C. Blaukopf, A.Z. Politi, T. Muller-Reichert, B. Neumann, I. Poser, J.  
623 Ellenberg, A.A. Hyman, and D.W. Gerlich. 2016. Ki-67 acts as a biological  
624 surfactant to disperse mitotic chromosomes. *Nature*. 535:308-312.
- 625 Gassmann, R., P. Vagnarelli, D. Hudson, and W.C. Earnshaw. 2004. Mitotic  
626 chromosome formation and the condensin paradox. *Exp Cell Res*. 296:35-42.
- 627 Gerlich, D., T. Hirota, B. Koch, J.M. Peters, and J. Ellenberg. 2006. Condensin I  
628 stabilizes chromosomes mechanically through a dynamic interaction in live cells.  
629 *Current biology : CB*. 16:333-344.
- 630 Green, L.C., P. Kalitsis, T.M. Chang, M. Cipetic, J.H. Kim, O. Marshall, L. Turnbull,  
631 C.B. Whitchurch, P. Vagnarelli, K. Samejima, W.C. Earnshaw, K.H. Choo, and  
632 D.F. Hudson. 2012. Contrasting roles of condensin I and condensin II in mitotic  
633 chromosome formation. *Journal of cell science*. 125:1591-1604.
- 634 Hirano, T. 2016. Condensin-Based Chromosome Organization from Bacteria to  
635 Vertebrates. *Cell*. 164:847-857.
- 636 Hirota, T., D. Gerlich, B. Koch, J. Ellenberg, and J.M. Peters. 2004. Distinct functions  
637 of condensin I and II in mitotic chromosome assembly. *Journal of cell science*.  
638 117:6435-6445.
- 639 Johnston, J., W.B. Iser, D.K. Chow, I.G. Goldberg, and C.A. Wolkow. 2008.  
640 Quantitative image analysis reveals distinct structural transitions during aging in  
641 *Caenorhabditis elegans* tissues. *PLoS One*. 3:e2821.
- 642 Maresca, T.J., B.S. Freedman, and R. Heald. 2005. Histone H1 is essential for mitotic  
643 chromosome architecture and segregation in *Xenopus laevis* egg extracts. *J Cell*  
644 *Biol*. 169:859-869.
- 645 Mazumdar, M., J.H. Lee, K. Sengupta, T. Ried, S. Rane, and T. Misteli. 2006. Tumor  
646 formation via loss of a molecular motor protein. *Current biology : CB*.  
647 16:1559-1564.
- 648 Natsume, T., T. Kiyomitsu, Y. Saga, and M.T. Kanemaki. 2016. Rapid Protein  
649 Depletion in Human Cells by Auxin-Inducible Degron Tagging with Short  
650 Homology Donors. *Cell Rep*. 15:210-218.
- 651 Ono, T., Y. Fang, D.L. Spector, and T. Hirano. 2004. Spatial and temporal regulation of

- 652 Condensins I and II in mitotic chromosome assembly in human cells. *Mol Biol*  
653 *Cell*. 15:3296-3308.
- 654 Ono, T., C. Sakamoto, M. Nakao, N. Saitoh, and T. Hirano. 2017. Condensin II plays an  
655 essential role in reversible assembly of mitotic chromosomes in situ. *Mol Biol*  
656 *Cell*.
- 657 Orlov, N., L. Shamir, T. Macura, J. Johnston, D.M. Eckley, and I.G. Goldberg. 2008.  
658 WND-CHARM: Multi-purpose image classification using compound image  
659 transforms. *Pattern Recognit Lett*. 29:1684-1693.
- 660 Saiwaki, T., I. Kotera, M. Sasaki, M. Takagi, and Y. Yoneda. 2005. In vivo dynamics  
661 and kinetics of pKi-67: transition from a mobile to an immobile form at the  
662 onset of anaphase. *Exp Cell Res*. 308:123-134.
- 663 Samejima, K., I. Samejima, P. Vagnarelli, H. Ogawa, G. Vargiu, D.A. Kelly, F. de  
664 Lima Alves, A. Kerr, L.C. Green, D.F. Hudson, S. Ohta, C.A. Cooke, C.J. Farr,  
665 J. Rappsilber, and W.C. Earnshaw. 2012. Mitotic chromosomes are compacted  
666 laterally by KIF4 and condensin and axially by topoisomerase IIalpha. *J Cell*  
667 *Biol*. 199:755-770.
- 668 Scholzen, T., and J. Gerdes. 2000. The Ki-67 protein: from the known and the unknown.  
669 *J Cell Physiol*. 182:311-322.
- 670 Shintomi, K., T.S. Takahashi, and T. Hirano. 2015. Reconstitution of mitotic  
671 chromatids with a minimum set of purified factors. *Nat Cell Biol*. 17:1014-1023.
- 672 Silk, A.D., A.J. Holland, and D.W. Cleveland. 2009. Requirements for NuMA in  
673 maintenance and establishment of mammalian spindle poles. *J Cell Biol*.  
674 184:677-690.
- 675 Takagi, M., T. Natsume, M.T. Kanemaki, and N. Imamoto. 2016. Perichromosomal  
676 protein Ki67 supports mitotic chromosome architecture. *Genes Cells*.  
677 21:1113-1124.
- 678 Takagi, M., Y. Nishiyama, A. Taguchi, and N. Imamoto. 2014. Ki67 antigen contributes  
679 to the timely accumulation of protein phosphatase 1gamma on anaphase  
680 chromosomes. *The Journal of biological chemistry*. 289:22877-22887.
- 681 Takahashi, M., T. Wakai, and T. Hirota. 2016. Condensin I-mediated mitotic  
682 chromosome assembly requires association with chromokinesin KIF4A. *Genes*  
683 *Dev*. 30:1931-1936.
- 684 Tokunaga, K., N. Saitoh, I.G. Goldberg, C. Sakamoto, Y. Yasuda, Y. Yoshida, S.

- 685           Yamanaka, and M. Nakao. 2014. Computational image analysis of colony and  
686           nuclear morphology to evaluate human induced pluripotent stem cells. *Sci Rep.*  
687           4:6996.
- 688   Uhlmann, F. 2016. SMC complexes: from DNA to chromosomes. *Nat Rev Mol Cell*  
689           *Biol.* 17:399-412.
- 690   Vanneste, D., M. Takagi, N. Imamoto, and I. Vernos. 2009. The role of Hk1p2 in the  
691           stabilization and maintenance of spindle bipolarity. *Current biology : CB.*  
692           19:1712-1717.
- 693
- 694

694 **Figure legends**

695

696 **Figure 1. Ki-67 and hCAP-H/H2 localize on mitotic chromosomes independently of**

697 **one another.** (A) Schematic diagram of the cell preparation protocol. Thymidine (2

698 mM), RO-3306 (10  $\mu$ M), STLC (10  $\mu$ M), and IAA (0.5 mM) were added and/or washed

699 out at the indicated time points. AID-tagged proteins are subjected to

700 proteasome-mediated degradation upon the treatment of cells with IAA. (B)

701 Immunoblot analysis of HCT116 (control), AID11 and AID44 cells. Membranes were

702 probed with specific antibodies against the indicated proteins. The asterisk indicates a

703 non-specific band. (C-D) Immunofluorescence analysis of AID11 and AID44 cells

704 prepared in the absence (-) or presence (+) of IAA. Ki-67 and hCAP-H/H2 were

705 detected via the fluorescence of mClover and mCherry, respectively, fused to their

706 C-terminal ends. Topo II $\alpha$  was detected by indirect immunofluorescence (IF) using a

707 specific antibody. DNA was counterstained with Hoechst 33342. (E) Immunoblot

708 analysis of AID12 and AID13 cells. Membranes were probed with specific antibodies

709 against the indicated proteins. The asterisk indicates a non-specific band. (F-G)

710 Immunofluorescence analysis of AID12 and AID13 cells prepared in the absence (-) or

711 presence (+) of IAA. hCAP-H and hCAP-H2 were detected via the fluorescence of

712 mCherry fused to their C-terminal ends. Ki-67 and topo II $\alpha$  were detected by indirect

713 immunofluorescence (IF) using specific antibodies. DNA was counterstained with

714 Hoechst 33342. The areas indicated by the white squares are 4.2-times enlarged and

715 shown on the bottom. Scale bars, 10  $\mu$ m.

716

717 **Figure 2. Ki-67 localizes on mitotic chromosomes independently of SMC2.** (A)

718 Schematic diagram of the cell preparation protocol. Thymidine (2 mM), DOX (2 µg/ml),

719 RO-3306 (10 µM), STLC (10 µM), and IAA (0.5 mM) were added and/or washed out at

720 the indicated time points. AID-tagged proteins are subjected to proteasome-mediated

721 degradation upon the treatment of cells with DOX plus IAA. (B) Immunoblot analysis

722 of NIG430 (a mother cell of AID29 and AID30), AID29 and AID30 cells. Membranes

723 were probed with specific antibodies against the indicated proteins. (C) Fluorescence

724 intensities of SMC2-mACh in AID30 cells prepared in the absence (-) or presence (+)

725 of IAA. Each circle represents the fluorescence intensity of an individual cell relative to

726 the average intensity of untreated AID30 cells. (D) Immunofluorescence analysis of

727 AID30 cells prepared in the absence (-) or presence (+) of IAA. SMC2 was detected via

728 the fluorescence of mCherry fused to the C-terminal end. Ki-67 and topo II $\alpha$  were

729 detected with indirect immunofluorescence (IF) using specific antibodies. DNA was

730 counterstained with Hoechst 33342. Images of AID30 cells, in which

731 SMC2-mAID-mCherry was degraded only moderately (second row) or completely

732 (third row), are shown. The areas indicated by the white squares are 4.2-times enlarged

733 and shown on the right. Scale bars, 10 µm.

734

735 **Figure 3. Rapid loss of the structural integrity of chromosomes immediately after**

736 **NEBD in cells devoid of both Ki67 and SMC2.** (A) Schematic diagram of the cell

737 preparation protocol. Thymidine (2 mM), DOX (2 µg/ml), RO-3306 (10 µM), STLC

738 (10  $\mu$ M), Hoechst 33342 (100 ng/ml), and IAA (0.5 mM) were added and/or washed out  
739 at the indicated time points. (B) Immunoblot analysis of AID35 cells. Membranes were  
740 probed with specific antibodies against the indicated proteins. (C) Fluorescence  
741 intensities of Ki-67-mAC1 in AID35 cells prepared in the absence (-) or presence (+) of  
742 IAA. Each circle represents the fluorescence intensity of an individual cell relative to  
743 the average intensity of untreated AID35. The horizontal bars show the average  
744 intensities. (D-E) Live observation of AID35 cells prepared in the absence (D) or  
745 presence (E) of IAA. Images were taken at 10-min intervals. The first frame after  
746 NEBD marks the time point 0. DIC: differential interference contrast. Shown here are  
747 representative image sets out of more than six image sets captured. Scale bars, 10  $\mu$ m.  
748

749 **Figure 4. Rapid loss of the structural integrity of mitotic chromosomes in cells**

750 **devoid of both Ki67 and SMC2 even after their assembly is complete.** (A)

751 Schematic diagram of the cell preparation protocol. Thymidine (2 mM), DOX (2  $\mu$ g/ml),  
752 RO-3306 (10  $\mu$ M), STLC (10  $\mu$ M), Hoechst 33342 (100 ng/ml), and IAA (0.5 mM)  
753 were added and/or washed out at the indicated time points. AID-tagged proteins are  
754 subjected to proteasome-mediated degradation upon the treatment of cells with IAA.  
755 (B) Live observation of AID35 cells. Images were taken at 10-min intervals over 100  
756 min, and only the selected frames are represented (all images are represented in Fig. S3).  
757 Ki-67-mAC1 and SMC2-mACh were degraded over time as intended, and mitotic  
758 chromosomes accordingly lost the structural integrity. The characteristic protrusions are  
759 marked with arrowheads. DIC: differential interference contrast. Shown here are

760 representative image serieses of more than eight captured image serieses. Scale bars,  
761 10  $\mu\text{m}$ .  
762  
763 **Figure 5. Quantitative analyses of chromosome morphology using a**  
764 **machine-learning algorism.** (A) Representative images of mitotic chromosomes  
765 observed in four different experimental settings. The sources of the images include  
766 AID2 cells in the absence (-) or presence (+) of IAA according to the protocol  
767 illustrated in Figure 1 A, and AID30 and AID35 cells in the presence (+) of IAA  
768 according to the protocol illustrated in Figure 2 A. For collecting chromosome images  
769 from the IAA-treated cells, cells were selected in which the fluorescence signals of  
770 Ki-67-mACl and/or SMC2-mACh were diminished to an undetectable level. 36 images  
771 were collected from each setting and stored as four different classes ( $\Delta\text{Cont}$ ,  $\Delta\text{Ki-67}$ ,  
772  $\Delta\text{SMC2}$  and  $\Delta\text{Ki-67}\Delta\text{SMC2}$ ). Scale bar, 10  $\mu\text{m}$ . (B-D) Wndchrn analysis. (B)  
773 Assessment of the optimum numbers of training images required for classification.  
774 Different numbers of images (5-35 images) from each class were used as training  
775 images for constructing classifiers. The classification accuracy (CA) of each classifier  
776 was determined by cross validation tests. The values shown are the mean and SD from  
777 20 independent tests. The accuracy reached a plateau when more than 15 training  
778 images were used. (C-D) Morphological distance (MD) and phylogeny. Images  
779 obtained from each of the four settings were randomly divided into two subclasses (each  
780 containing 18 images) and one of them served as a negative control of another. The MD  
781 values shown are the mean and SD from 20 independent cross validation tests. Statistics



782 are from a two-tailed Student's *t* test.

783

784 **Figure 6. Behavior of chromosomal and non-chromosomal markers in cells devoid**  
785 **of both Ki-67 and SMC2.** AID35 cells (A-C) and AID30 cells (D) were prepared in the  
786 absence (-) or presence (+) of IAA according to the protocol depicted in Figure 2 A, and  
787 processed for immunofluorescence using antibodies against  $\alpha$ -tubulin (A), Hec1 (B),  
788 topo II $\alpha$  (C), or  $\alpha$ -tubulin and pericentrin (D). (A-C) Ki-67 and SMC2 were detected  
789 via the fluorescence of mClover and mCherry, respectively, fused to their C-terminal  
790 ends. (A-D) DNA was counterstained with Hoechst 33342. Scale bars, 10  $\mu$ m. (E)  
791 Distances between the centroid of chromatin mass (blue) and Hec1-positive region (red)  
792 of IAA-treated AID30 and AID35 cells (20 cells each) were measured and plotted. The  
793 results from two independent experiments are shown.

794

795 **Figure 7. Ki-67 and condensins support the integrity of mitotic chromosomes**  
796 **through distinct mechanisms.** (A) In control cells, Ki-67 (green) and condensins (red)  
797 support the integrity of mitotic chromosomes internally and externally, respectively. (B)  
798 In cells devoid of Ki-67, mitotic chromosomes are slightly swollen and tend to be  
799 coalesced with each other. (C) In cells devoid of SMC2, mitotic chromosomes are  
800 severely disorganized. The centromere/kinetochore regions tend to be clustered at the  
801 side of the chromatin mass close to the centrosome (not shown). (D) When both Ki-67  
802 and SMC2 are depleted, all chromosomes apparently fused to form a single cluster,  
803 which we call a “slime ball”, from which the centromere/kinetochore regions tend to

804 protrude toward a single direction through the action of microtubules. See the text for

805 details.

806

807

807 **Supplementary figure legends**

808

809 **Figure S1. Loss of the structural integrity of mitotic chromosomes in cells devoid of**

810 **Ki-67 and hCAP-H or cells devoid of Ki-67 and hCAP-H2.** (A) Immunoblot analysis

811 of AID14 and AID15 cells prepared as illustrated in Figure 1A. Membranes were

812 probed with specific antibodies against the indicated proteins. (B-C)

813 Immunofluorescence analysis of AID14 and AID15 cells prepared in the absence (-) or

814 presence (+) of IAA. Ki-67 and hCAP-H/H2 were detected by the fluorescence of

815 mClover and mCherry, respectively, fused to their C-terminal ends. Topo II $\alpha$  were

816 detected with indirect immunofluorescence (IF) using a specific antibody. DNA was

817 counterstained with Hoechst 33342. The areas indicated by the white squares are

818 4.2-times enlarged and shown on the bottom. (D) Representative images of mitotic

819 chromosomes formed in AID14 and AID15 treated with IAA. Scale bars, 10  $\mu$ m.

820

821 **Figure S2. FRAP analysis of Ki-67 in the presence or absence of SMC2.** (A)

822 Schematic diagram of the cell preparation protocol. AID14 cells were transfected with

823 control siRNA (siControl) or siRNA against SMC2 (siSMC2) twice, the first time at

824 time 0 by a reverse transfection method and the second time at 24 h by a forward

825 transfection method, and then processed for synchronization into mitosis. Thymidine (2

826 mM), RO-3306 (10  $\mu$ M), Hoechst 33342 (100 ng/ml), and STLC (10  $\mu$ M) were added

827 and/or washed out at the indicated time points. (B-E) FRAP on Ki-67-mAC1 in AID14

828 transfected with siControl (B-C) or siSMC2 (D-E). (B, D) Representative image sets.

829 The areas marked with red dashed circles were bleached. Time relative to the bleach  
830 point are indicated. (C, E) Recovery curves of Ki67-mACh fluorescence. Data from  
831 single cells were drawn in grey. Thick curves and bars display mean  $\pm$ SD. In AID14  
832 transfected with siControl, Ki-67-mACh was highly mobile showing  $\sim$ 92% recovery in  
833 240 s after bleaching, a result consistent with the previous observation on EGFP-Ki-67  
834 transiently expressed in HeLa cells (Saiwaki et al., 2005). In AID14 transfected with  
835 siSMC2, depletion of SMC2 was indirectly monitored by the disappearance of  
836 hCAP-H-mACh fluorescence from mitotic chromosomes. We found that the FRAP of  
837 Ki-67-mACh in the condensin-depleted cells was indistinguishable from that observed  
838 in the control cells. Scale bars, 10  $\mu$ m.

839

840 Figure S3. **Rapid loss of the structural integrity of mitotic chromosomes in cells**

841 **devoid of both Ki67 and SMC2 even after their assembly is complete. (A)**

842 Schematic diagram of the cell preparation protocol. Thymidine (2 mM), DOX (2  $\mu$ g/ml),  
843 RO-3306 (10  $\mu$ M), STLC (10  $\mu$ M), Hoechst 33342 (100 ng/ml), and IAA (0.5 mM)  
844 were added and/or washed out at the indicated time points. AID-tagged proteins are  
845 subjected to proteasome-mediated degradation upon the treatment of cells with IAA.

846 (B-C) AID35 cells, HCT116-based cells expressing Ki-67-mACh and SMC2-mACh,  
847 were filmed at 10-min intervals over 100 minutes. In the cell #1 (B), Ki-67-mACh and  
848 SMC2-mACh were degraded over time as intended, and mitotic chromosomes  
849 accordingly lost the structural integrity. The characteristic protrusions are marked with  
850 arrowheads. The cell #2 (C), in which both proteins escaped from degradation during

851 the imaging period, is presented here as a control. DIC: differential interference contrast.

852 Shown here are representative image sets out of more than eight image sets captured.

853 Scale bars, 10  $\mu\text{m}$ .

854

855 Figure S4. **Behavior of chromosomal and non-chromosomal markers in cells devoid**

856 **of SMC2.** AID30 cells were prepared in the absence (-) or presence (+) of IAA

857 according to the protocol depicted in Figure 2 A, and processed for

858 immunofluorescence using antibodies against  $\alpha$ -tubulin (A), Hec1 (B), topo II  $\alpha$  (C), or

859  $\alpha$ -tubulin and Hec1 (D). Ki-67 and SMC2 were detected via the fluorescence of

860 mClover and mCherry, respectively, fused to their C-terminal ends. DNA was

861 counterstained with Hoechst 33342. (D) The area indicated by the white square is

862 enlarged four times and shown on the right. Note that, in the absence of SMC2,

863 microtubules (green) were bundled and Hec1 (red) was localized along the microtubule

864 bundles. Scale bars, 10  $\mu\text{m}$ .

865

866 Figure S5. **Behavior of centromere/kinetochore-associated proteins in cells devoid**

867 **of both Ki-67 and SMC2.** AID35 cells were treated in the absence (-) or presence (+)

868 of IAA according to the protocol depicted in Figure 2 A, and processed for

869 immunofluorescence using antibodies against CENP-A (A), CENP-I/hMis6 (B), BubR1

870 (C), or  $\alpha$ -tubulin and Hec1 (D). Mouse anti-CENP-A monoclonal antibody (3-19,

871 MBL) was used at 1:200 dilution in combination with goat anti-Mouse IgG (H+L),

872 Alexa Fluor 647 (Thermo Fisher Science). Rat anti-CENP-I/hMis6 polyclonal antibody

873 (PD032, MBL) was used at 1:100 dilution in combination with goat anti-Rat IgG (H+L),  
874 Alexa Fluor 647 (Thermo Fischer Science). Mouse anti-BubR1 monoclonal antibody  
875 (8G1, MBL) was used at 1:400 dilution in combination with goat anti-Mouse IgG  
876 (H+L), Alexa Fluor 647 (Thermo Fisher Science). Ki-67 and SMC2 were detected by  
877 the fluorescence of mClover and mCherry, respectively, fused to their C-terminal ends.  
878 DNA was counterstained with Hoechst 33342. Note that a certain amount of  
879 CENP-I/hMis6 was detected on the surface of mitotic chromosomes (B). (D) The area  
880 indicated by the white square is enlarged four times and shown on the right. Note that,  
881 in the absence of both Ki-67 and SMC2, microtubules (green) were bundled and Hec1  
882 (red) was localized along the microtubule bundles. Scale bars, 10  $\mu\text{m}$  for A-C and 2.5  
883  $\mu\text{m}$  for D. (E) A model for the collapse of mitotic chromosome architecture upon  
884 degradation of both Ki-67 and SMC2 in STLC-treated cell. Paired sister mitotic  
885 chromosomes in control cells are shown in single ovoid with one kinetochore (black  
886 dot) for simplicity. The force exerted on kinetochores is depicted by the blue arrows.  
887 Upon depletion of Ki-67 (green), chromosomes come to closer and start to interfere  
888 mutually (depicted with red bidirectional arrows). Microtubules (black lines) display  
889 radial array even in the absence of Ki-67. Upon depletion of SMC2, the chromosome  
890 architecture is disturbed but not collapsed completely. At the same time, microtubules  
891 lose the symmetric array and become bundled, and the fashion of microtubule  
892 attachment to kinetochore appears to be changed from “end-on” to “lateral”. Under the  
893 condition where the effects of Ki-67- and SMC2-depletions are overlapped, the  
894 architecture of mitotic chromosome is severely collapsed. We speculate that the

895 collapse might be accelerated by the unidirectional pulling force exerted on  
896 kinetochores along bundled microtubules. Kinetochores are denoted by two different  
897 symbols (filled or hollow circles) to express the difference in their properties. Whereas  
898 kinetochores denoted by filled circles can establish the end-on attachments of  
899 microtubules, kinetochores denoted by hollow circles tend to establish the lateral  
900 attachment to microtubules.

901

902 **Table S1. AID cell lines used in this study.** A panel of cell lines, collectively called  
903 AID cells, were generated from HCT116 cells via successive CRISPR/Cas9-mediated  
904 genome editing as described previously (Natsume et al., 2016). Briefly, as the first step,  
905 the constitutive or doxycycline-inducible expression unit of *OsTIR1* was integrated in  
906 the AAVS1 locus of the HCT116 genome to generate cells called NIG272 or NIG430,  
907 respectively. In these cells, cassette sequences encoding variable tags were knocked-in  
908 immediately upstream of the stop codons of genes to be analyzed. Hyg; hygromycin,  
909 Neo; neomycin.

910

911 **Table S2. Primers used for genomic PCR.**

912

913 **Table S3. Antibodies used in this study.**

914

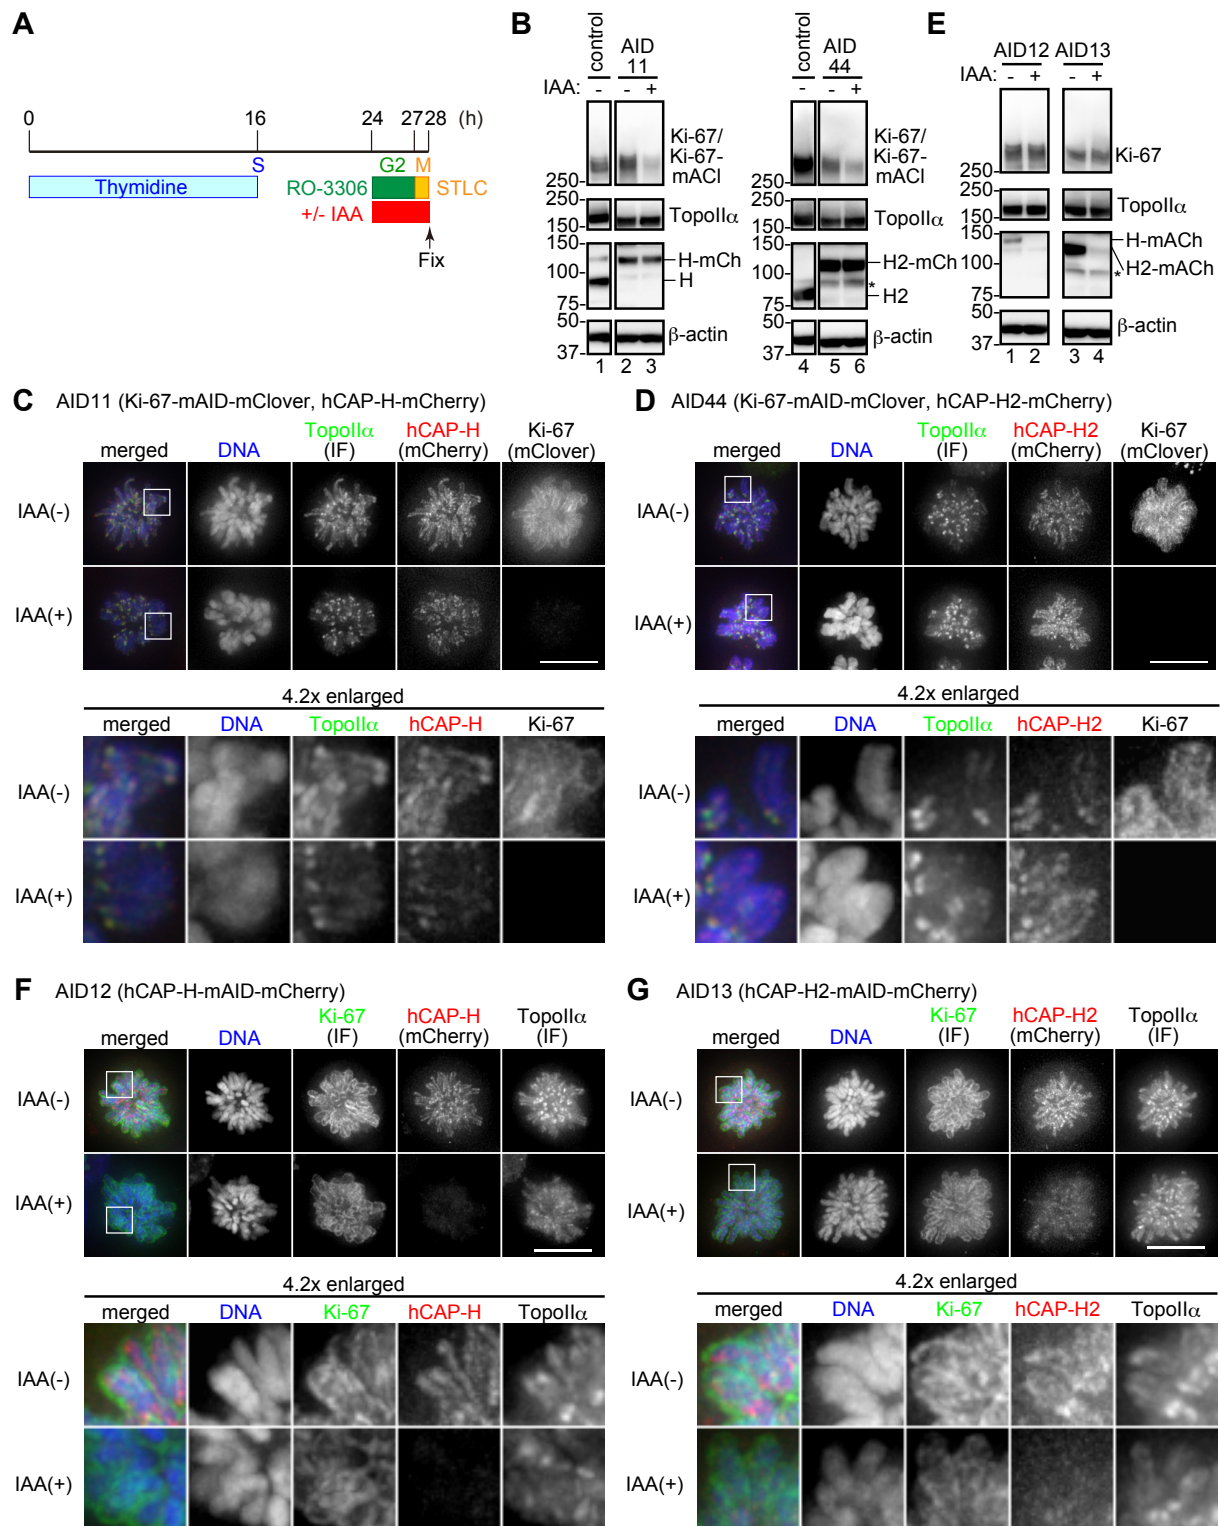



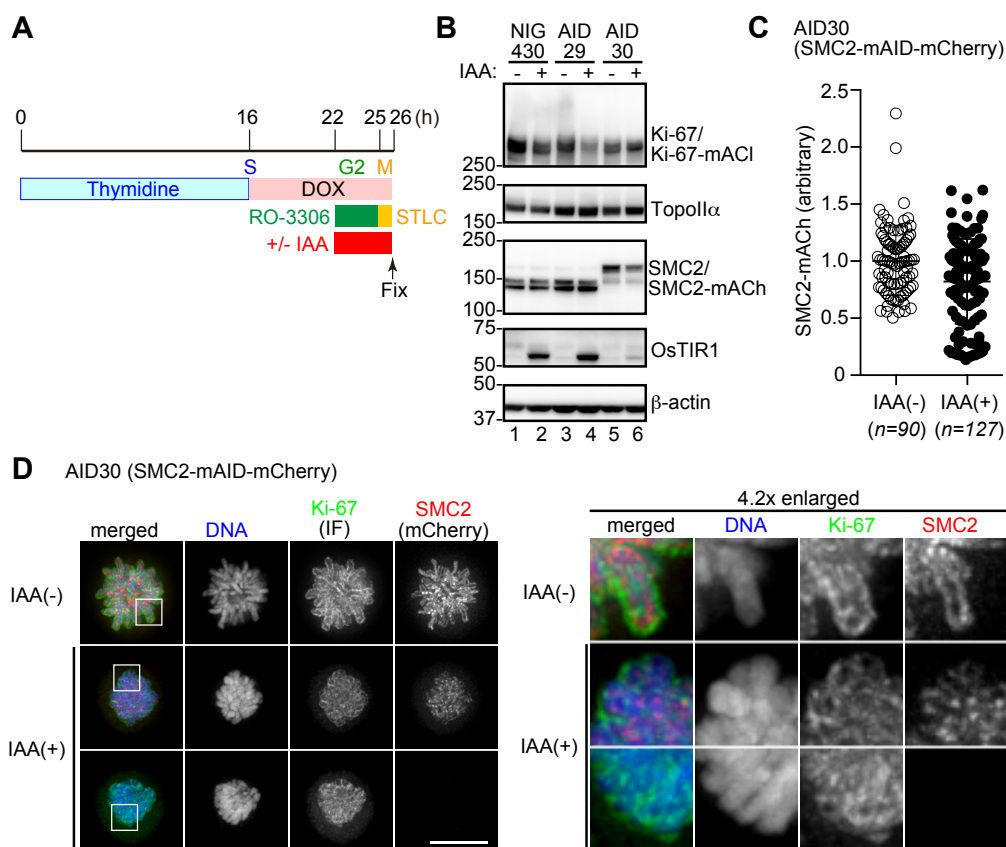

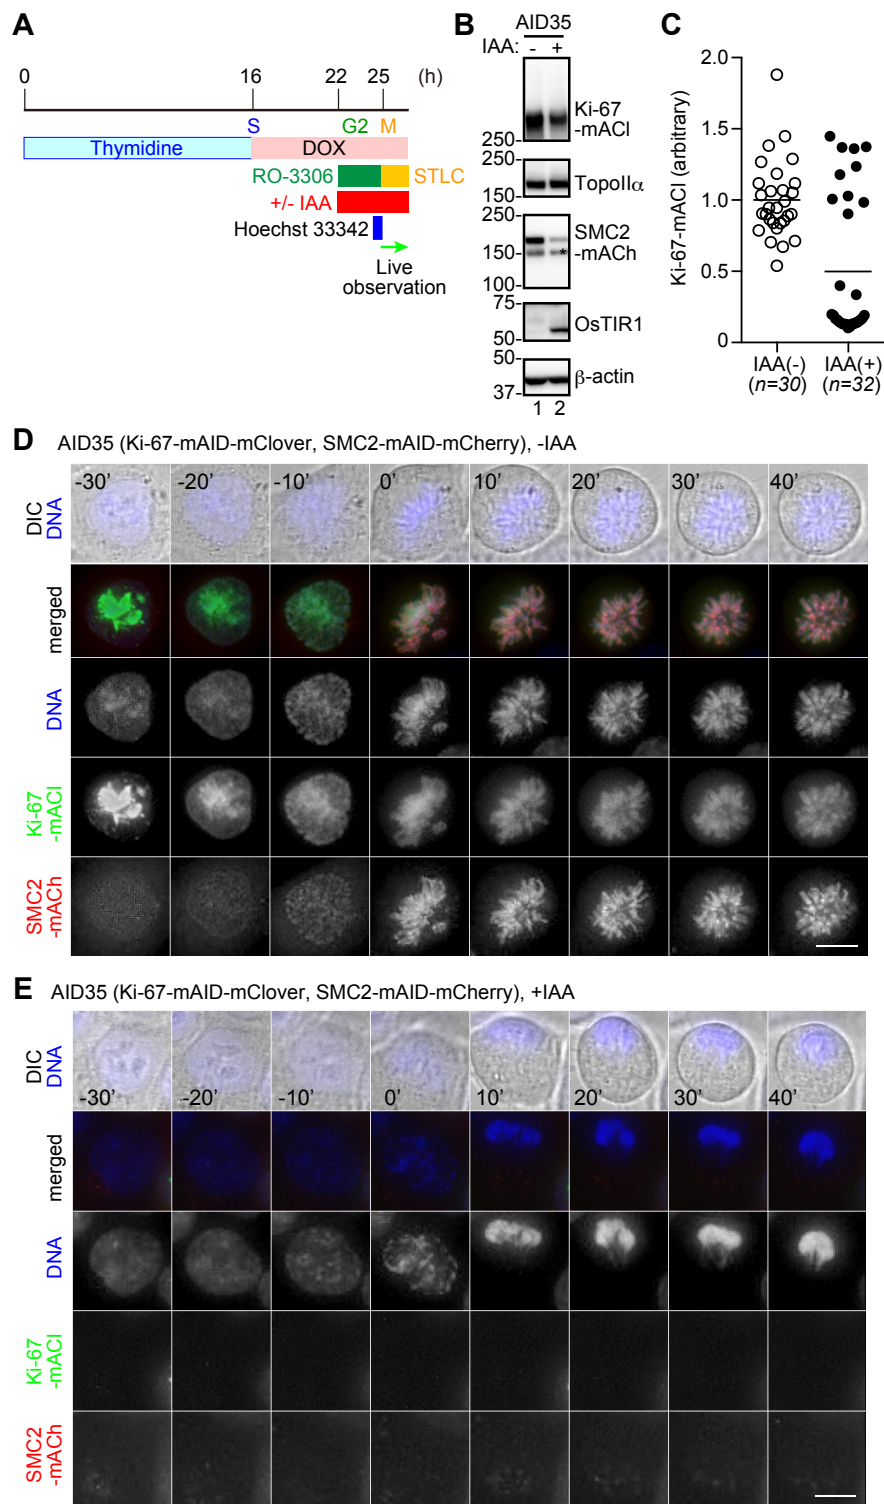

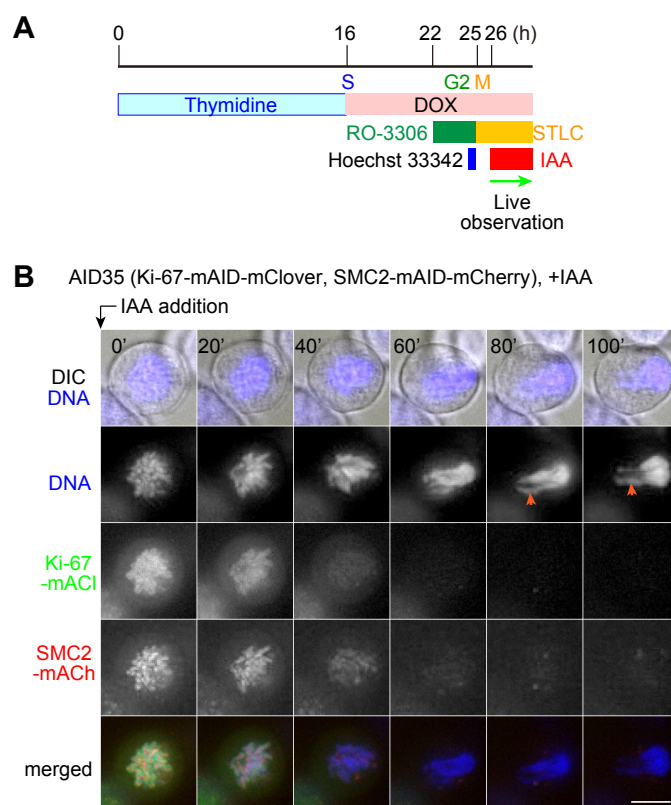

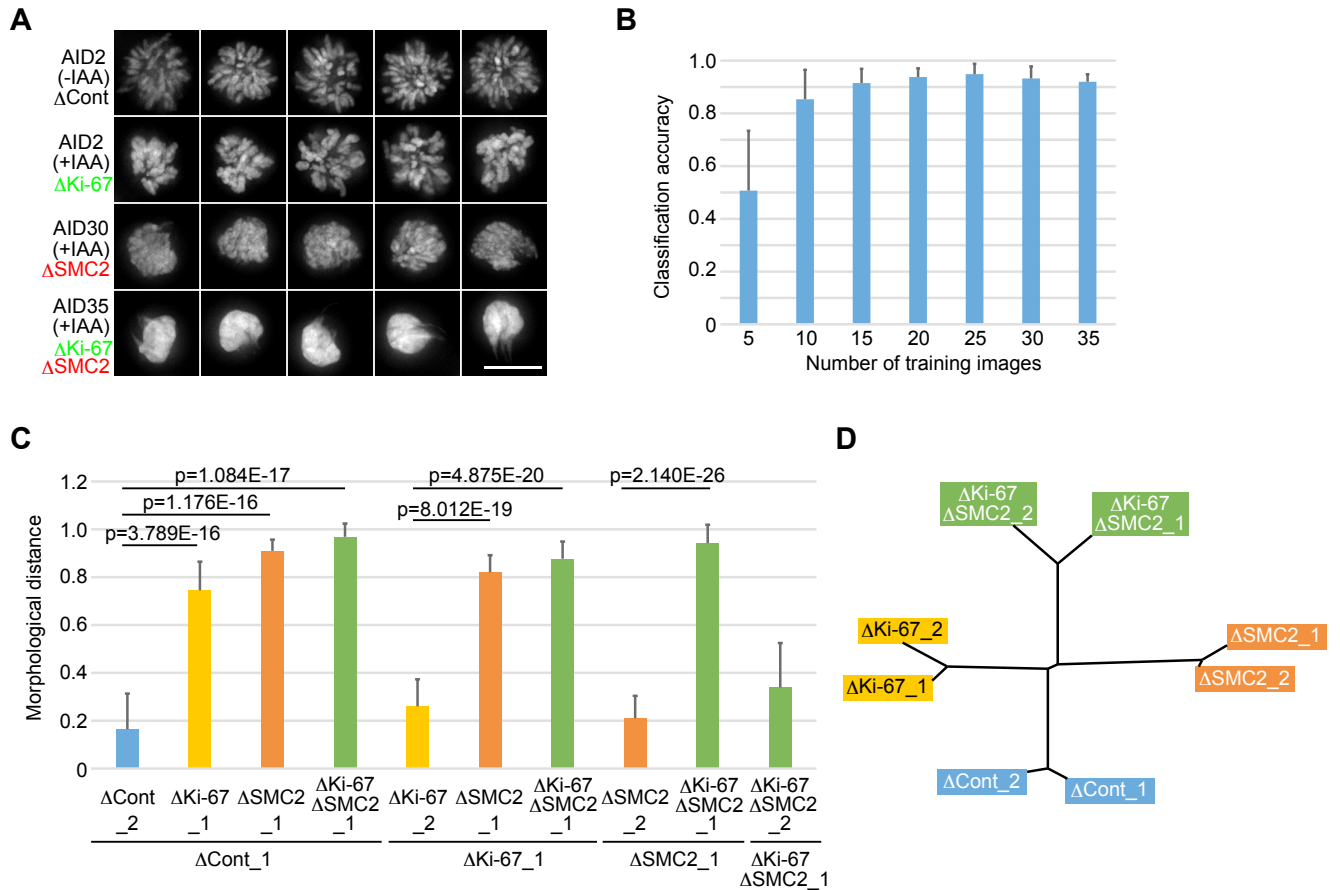

**A-C** AID35 (Ki-67-mAID-mClover, SMC2-mAID-mCherry)

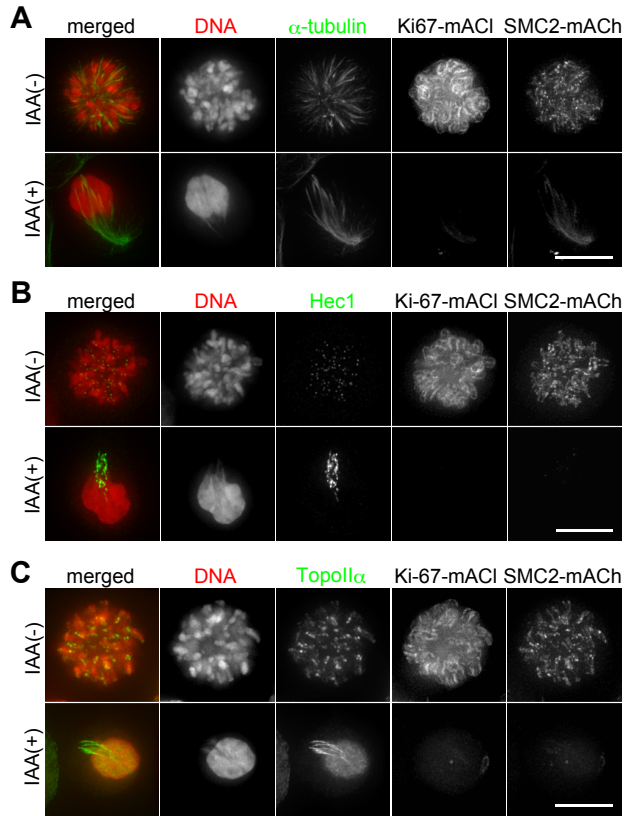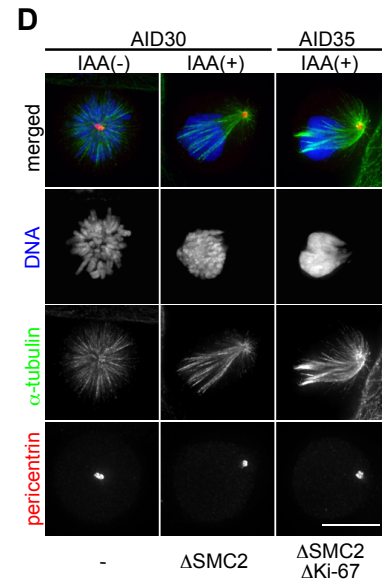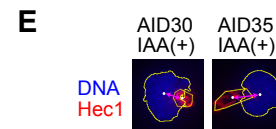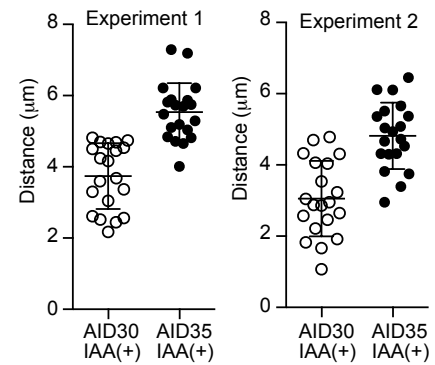

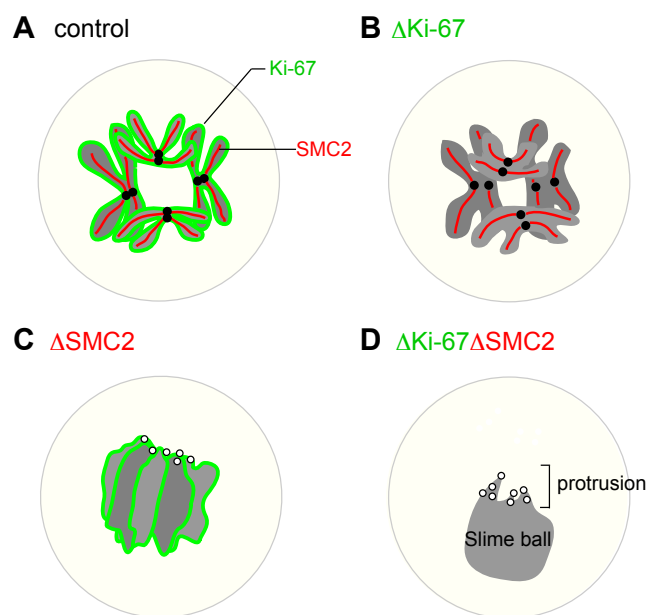

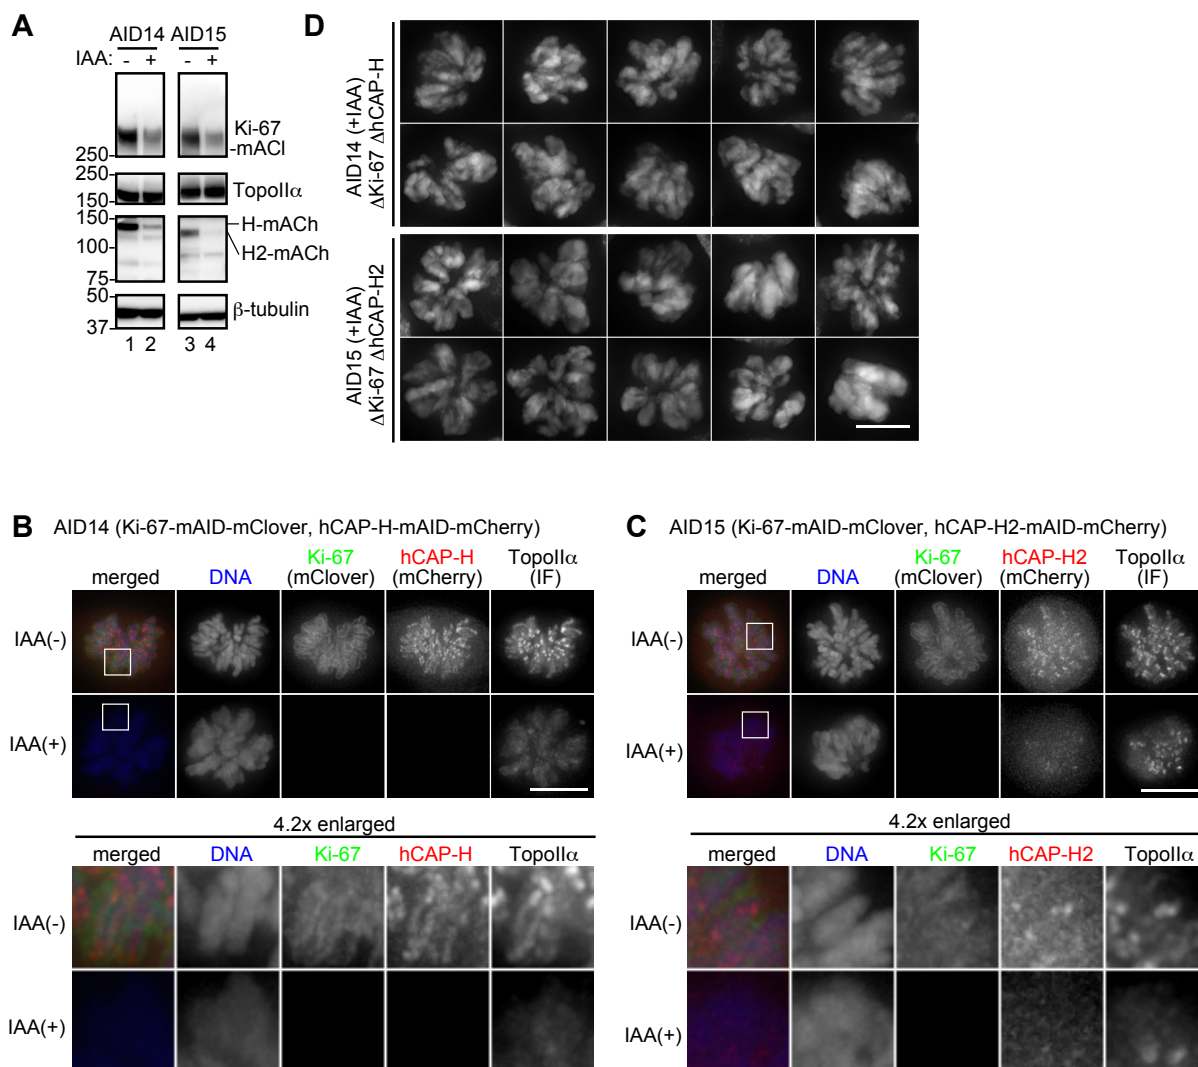



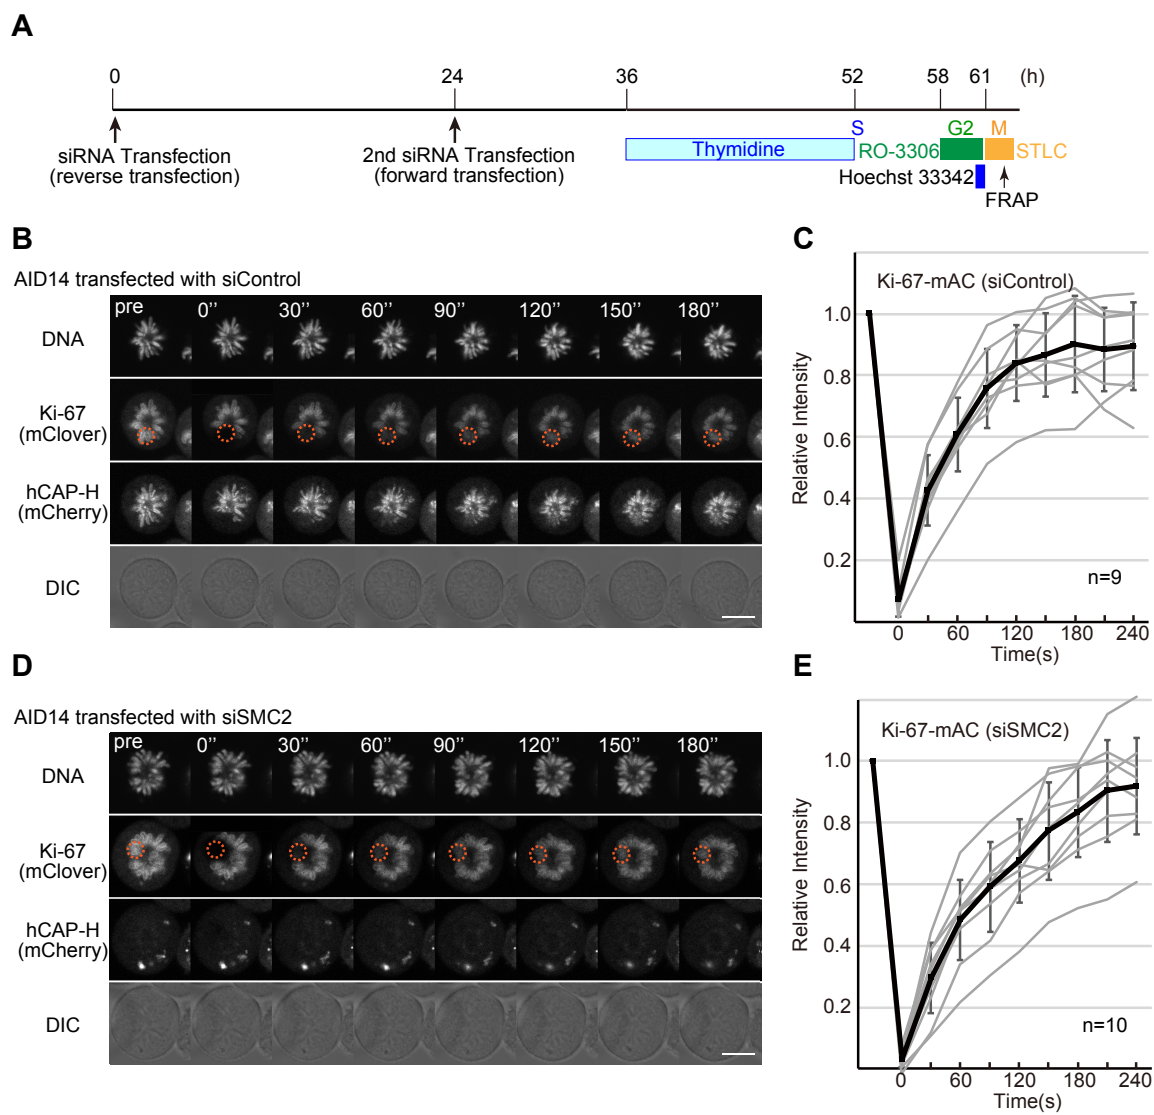



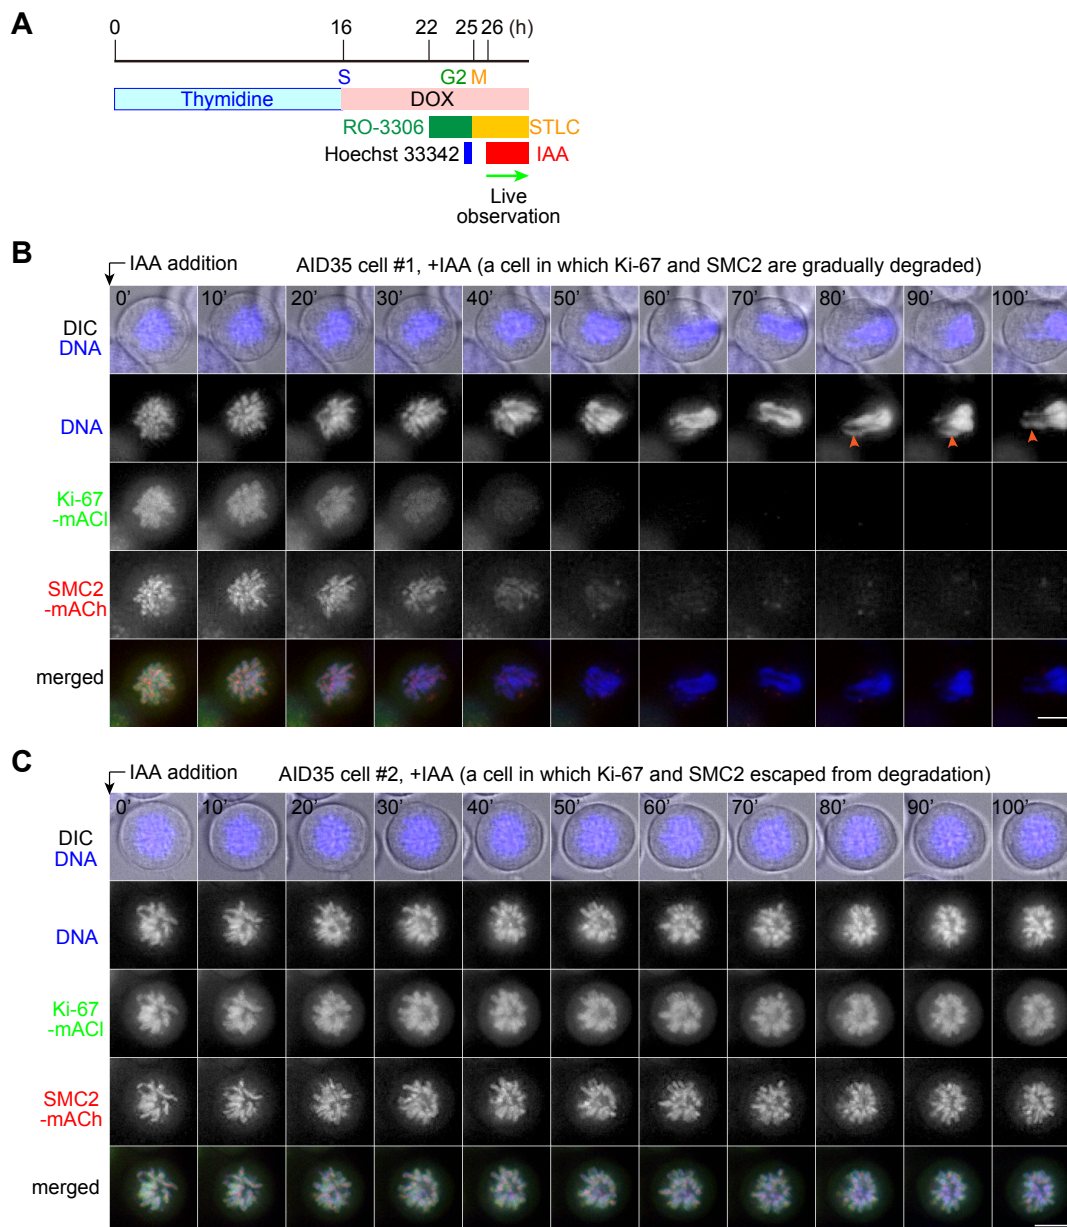

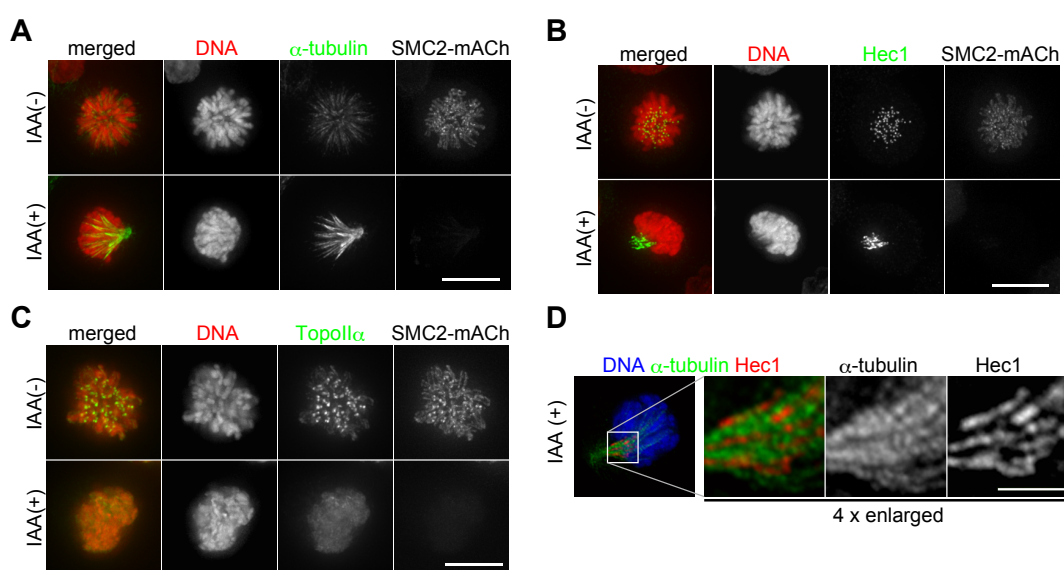

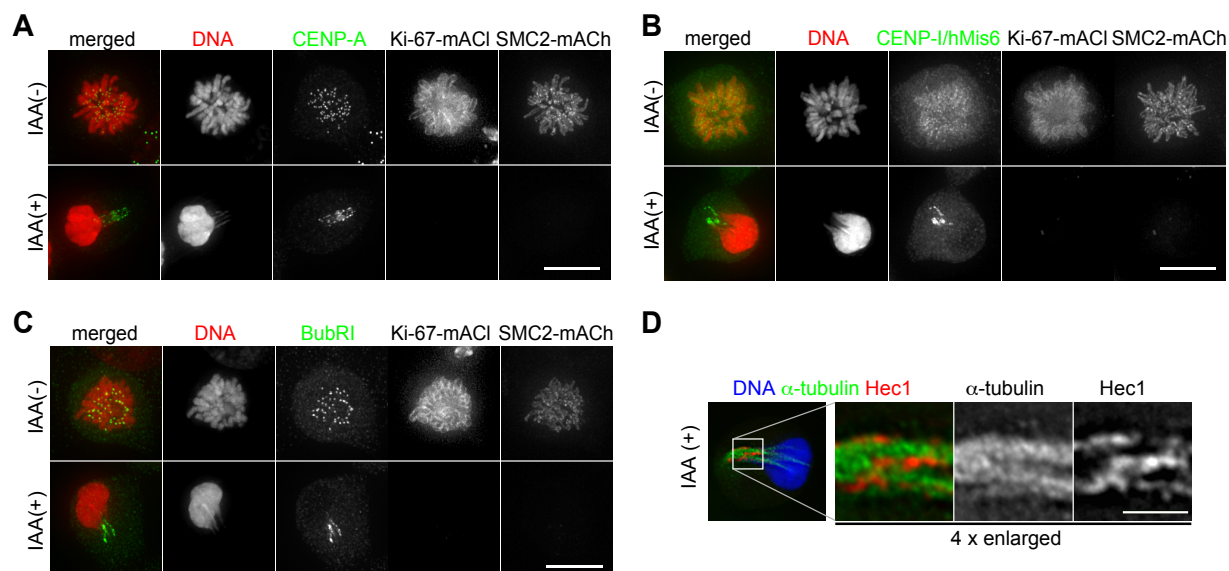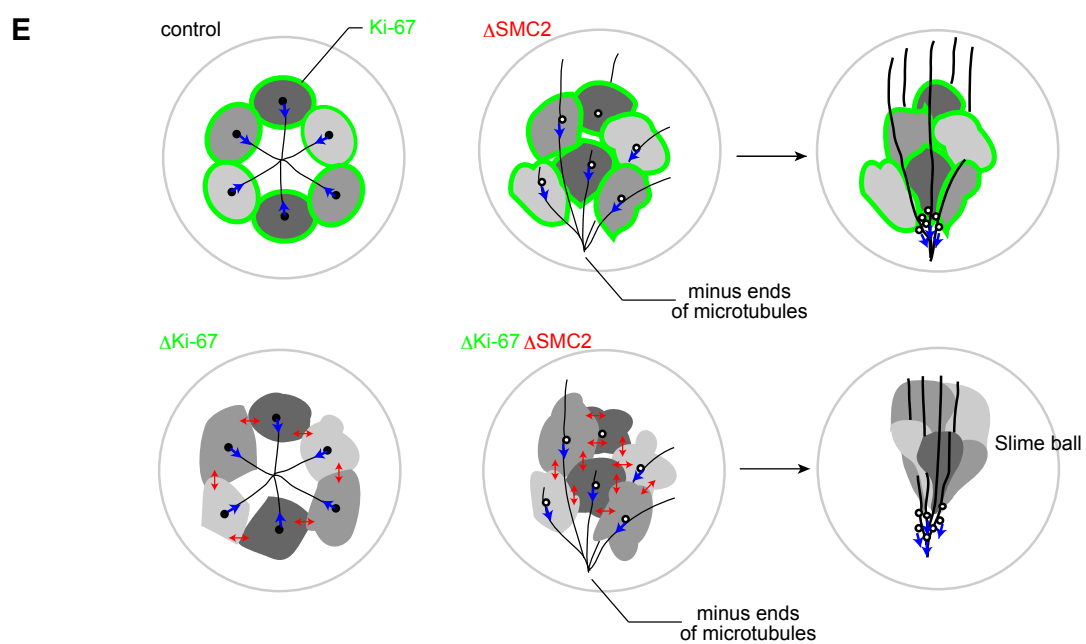

**Table S1. AID cells used in this study**

| Cell line | Target #1          |         |              |                  | Target #2 |              |                  |                                                | Targeting Construct | Knock-in Construct | Reference            |
|-----------|--------------------|---------|--------------|------------------|-----------|--------------|------------------|------------------------------------------------|---------------------|--------------------|----------------------|
|           | Immediate ancestor | Gene    | Tag          | Selection Marker | Gene      | Tag          | Selection Marker | Guide RNA target sequence                      |                     |                    |                      |
| AID2      | NIG272             | Ki-67   | mAID-mClover | Hyg              |           |              |                  | TTTGACAGAAAATCGAACT                            | pMT671              | pMT670             | Takagi et al. (2016) |
| AID11     | AID2               | Ki-67   | mAID-mClover | Hyg              | hCAP-H    | mCherry      | Neo              | CAAGGAGATTGAGTTACTA                            | pMT691              | pMT692             |                      |
| AID12     | NIG272             | hCAP-H  | mAID-mCherry | Neo              |           |              |                  | CAAGGAGATTGAGTTACTA                            | pMT691              | pMT696-1           | this study           |
| AID13     | NIG272             | hCAP-H2 | mAID-mCherry | Neo              |           |              |                  | TGAGTGGGGAGCACCCGAGGC<br>& AGGAGCCCGTGTCTGCTCC | pMT694<br>& pMT695  | pMT698             | this study           |
| AID14     | AID2               | Ki-67   | mAID-mClover | Hyg              | hCAP-H    | mAID-mCherry | Neo              | CAAGGAGATTGAGTTACTA                            | pMT691              | pMT696-1           | this study           |
| AID15     | AID2               | Ki-67   | mAID-mClover | Hyg              | hCAP-H2   | mAID-mCherry | Neo              | TGAGTGGGGAGCACCCGAGGC<br>& AGGAGCCCGTGTCTGCTCC | pMT694<br>& pMT695  | pMT698             | this study           |
| AID29     | NIG430             | Ki-67   | mAID-mClover | Hyg              |           |              |                  | TTTGACAGAAAATCGAACT                            | pMT671              | pMT670             | this study           |
| AID30     | NIG430             | SMC2    | mAID-mCherry | Neo              |           |              |                  | AACTTGCACATGTGCTCCTT                           | pMT678              | pMT680             | this study           |
| AID35     | AID29              | Ki-67   | mAID-mClover | Hyg              | SMC2      | mAID-mCherry | Neo              | AACTTGCACATGTGCTCCTT                           | pMT678              | pMT680             | this study           |
| AID44     | AID2               | Ki-67   | mAID-mClover | Hyg              | hCAP-H2   | mCherry      | Neo              | TGAGTGGGGAGCACCCGAGGC<br>& AGGAGCCCGTGTCTGCTCC | pMT694<br>& pMT695  | pMT697             | this study           |

A series of cells, collectively called AID cells, were generated from HCT116 cells via successive uses of CISPR/Cas9-mediated genome editing as described previously (Natsume et al., 2016). Briefly, as the first step, the constitutive or doxycycline-inducible expression units of OSTR1 was integrated in the AAVS1 locus of the HCT116 genome to generate cells called NIG272 or NIG430, respectively. In these cells, cassette sequences encoding variable tags were knocked in immediately upstream of the stop codons of genes to be analyzed. Hyg; hygromycin, Neo; neomycin.

## Table S2. Primers used for the genomic PCR

| Cell lines      | Primer 1                          | Primer 2                         |
|-----------------|-----------------------------------|----------------------------------|
| AID12 and AID14 | CCATT CCTC TTATT TGACT (P819)     | TTCAA GTAGT CGGGG ATGTC (P786)   |
| AID13 and AID15 | CCTTT GACAT CACAC CTAT (P808)     | GTACT TTGGC TTCAC TCACCT (P790)  |
| AID29           | GGACC TGCAT AATAC CTAGT AA (P708) | CCCAG CAAAT CCAAA GTTTT C (P709) |
| AID30 and AID35 | CTTAA GTTCA TTGTG GTGTC (P739)    | TCTGT TTCCT ATCTC AGTCT (P738)   |

**Table S3. Antibodies used in this study**

| <b>Antigen</b>            | <b>Species</b> | <b>Manufacturer or provider</b> | <b>#Catalog or clone name</b> | <b>IF dilution</b> | <b>WB dilution</b> |
|---------------------------|----------------|---------------------------------|-------------------------------|--------------------|--------------------|
| $\beta$ -actin            | mouse          | Sigma-Aldrich                   | AC-15                         |                    | 1:5,000            |
| $\alpha$ -tubulin         | mouse          | Sigma-Aldrich                   | DM1A                          | 1:10,000           |                    |
| BubR1                     | mouse          | MBL                             | 8G1                           | 1:400              |                    |
| CENP-A                    | mouse          | MBL                             | 3-19                          | 1:200              |                    |
| CENP-1/hMis6              | rat            | MBL                             | PD032                         | 1:100              |                    |
| hCAP-H/NCAPH              | rabbit         | ProteinTech                     | 11515-1                       |                    | 1:1,000            |
| hCAP-H2                   | rabbit         | § Hirano lab                    | AfR205-4L                     |                    | 1 $\mu$ g/ml       |
| HEC1                      | mouse          | GeneTex                         | 9G3                           | 1:1,000            |                    |
| Ki-67                     | rabbit         | Santa Cruz                      | sc-15402                      | 1:200              | 1:1,000            |
| Ki-67                     | mouse          | Merck Millipore                 | NA-59                         | 1:500              |                    |
| OSTR1                     | rabbit         | ¶ Kanemaki lab                  |                               |                    | 1:1,000            |
| pericentrin               | rabbit         | Abcam                           | ab44448                       | 1:1:000            |                    |
| SMC2                      | rabbit         | Abcam                           | ab10412                       |                    | 1:1,000            |
| topoisomerase II $\alpha$ | mouse          | MBL                             | 1C5                           | 1:1,000            | 1:2,000            |

**IF; immunofluorescence, WB; western blotting. § Ono et al. (2003). ¶ Natsume et al. (2016).**
